# Supplementary material
Source: publisher figshare collection journal article supplement (https://gsapubs.figshare.com/ndownloader/files/39548182)
Supplement: Supplementary file 1 [file 39548182]

## Sheet: Table S1
Table S1. EMPA major element copositions of allanite in metasomatic rocks in Dahongshan Group
	Allanite I (sample DHS13-43)
	Point No.	53	60	61	62	64	66	68	70	71	72	73		54	55	63	65	69	74		56
	Zoning	core	core	core	core	core	core	core	core	core	core	core		rim	rim	rim	rim	rim	rim		Ep overgrowth
	SiO2	31.987	32.704	32.092	32.569	32.301	32.289	32.549	32.359	32.097	32.147	32.379		32.591	32.807	32.793	32.564	32.724	32.679		32.725
	Na2O	0.126	0.088	0.115	0.137	0.089	0.037	0.044	0.042	0.168	0.126	0.077		0.145	0.083	0.068	0.059	0	0.096		0.173
	CaO	9.432	9.675	9.414	9.349	9.525	9.537	9.639	9.601	9.148	9.131	9.807		10.826	10.461	10.164	9.937	10.042	10.199		7.322
	ThO2	0.025	0	0.001	0	0	0	0	0	0.004	0.008	0		0	0.057	0.037	0.023	0.029	0.027		0.084
	P2O5	0.124	0.004	0.008	0.026	0.015	0	0.016	0.003	0.052	0.063	0.011		0.142	0.25	0.08	0.048	0.048	0.088		0.018
	FeOT	14.159	14.615	14.187	15.04	14.274	14.549	14.288	14.355	15.086	14.997	14.129		14.015	13.788	13.952	14.061	14.267	14.285		19.209
	MnO	0.66	0.603	0.47	0.593	0.419	0.358	0.417	0.281	0.667	0.676	0.602		0.422	0.574	0.585	0.475	0.547	0.622		0.348
	MgO	0.189	0.098	0.094	0.09	0.118	0.09	0.132	0.112	0.139	0.15	0.173		0.244	0.139	0.137	0.147	0.226	0.115		2.919
	Al2O3	15.376	14.895	15.198	14.521	15.444	15.173	15.157	15.036	14.546	14.881	15.516		15.789	15.833	15.726	15.523	15.193	15.595		14.7
	La2O3	8.358	9.617	9.613	9.412	9.45	9.845	9.602	9.663	9.225	9.083	8.713		8.195	8.395	8.395	8.865	8.724	8.444		5.741
	Ce2O3	11.477	11.288	11.819	12.179	11.85	11.998	11.737	11.953	11.699	11.685	11.066		10.155	10.562	10.61	11.104	10.847	10.481		7.631
	Nd2O3	3.006	2.617	2.632	2.705	2.997	2.809	2.724	2.895	2.843	2.991	3.032		2.443	2.63	2.824	2.906	2.827	2.659		1.723
	Pr2O3	0.906	0.783	0.904	0.885	0.908	0.899	0.844	0.964	0.856	0.965	0.891		0.81	0.786	0.93	0.811	0.801	0.894		0.618
	Total	95.825	96.987	96.547	97.506	97.39	97.584	97.149	97.264	96.53	96.903	96.396		95.777	96.365	96.301	96.523	96.275	96.184		93.211
	Atomic proportions based on 12.5 O and the sum of catios normalized to 8
	Si	3.12295	3.16827	3.13605	3.16121	3.12889	3.13403	3.15788	3.14979	3.1385	3.13037	3.13639		3.12058	3.14412	3.15613	3.14947	3.16711	3.14501		3.08988
	Na	0.0238514	0.0165293	0.0217889	0.0257823	0.0167154	0.00696309	0.00827679	0.0079266	0.0318506	0.0237891	0.0144614		0.0269189	0.0154228	0.0126892	0.0110638	0	0.0179133		0.0316709
	Ca	0.986679	1.00427	0.985691	0.972287	0.9886	0.991839	1.00201	1.00134	0.958438	0.952697	1.01785		1.11067	1.0742	1.04814	1.02976	1.04135	1.0517		0.740752
	Th	0.000555441	0	2.22378e-05	0	0	0	0	0	8.9007e-05	0.000177277	0		0	0.00124312	0.000810367	0.000506215	0.000638706	0.000591322		0.00180488
	P	0.0102491	0.000328061	0.000661835	0.00213647	0.0012301	0	0.00131417	0.000247219	0.00430462	0.00519362	0.000902056		0.0115107	0.0202837	0.00651834	0.00393021	0.00393289	0.00716985		0.00143883
	Fe2+	1.02753	1.06796	1.05553	1.07985	1.0579	1.08581	1.08859	1.09366	1.04955	1.06313	1.01705		0.910038	1.01443	1.02911	1.04585	1.05681	1.00521		0.851765
	Fe3+	0.128576	0.116161	0.103921	0.141021	0.098462	0.0952089	0.0707372	0.074933	0.184137	0.158203	0.127549		0.21225	0.0906923	0.093903	0.0914984	0.0979816	0.144549		0.66506
	Mn	0.0545795	0.0494803	0.0389025	0.0487526	0.0343782	0.0294324	0.0342679	0.0231679	0.055243	0.0557567	0.0493921		0.0342251	0.0465949	0.0476896	0.0389124	0.0448413	0.0507036		0.0278315
	Mg	0.0275085	0.0141534	0.0136939	0.0130228	0.0170401	0.0130228	0.0190918	0.0162524	0.0202622	0.0217752	0.024982		0.0348291	0.0198592	0.0196566	0.0211949	0.0326076	0.0164993		0.410876
	Al	1.76926	1.70066	1.75036	1.66112	1.76316	1.73571	1.73311	1.72494	1.67632	1.70783	1.77134		1.78176	1.78835	1.78381	1.76943	1.73299	1.76887		1.63582
	La	0.300976	0.343637	0.346484	0.336953	0.337633	0.352455	0.343604	0.346926	0.332707	0.32623	0.311296		0.289418	0.296751	0.298011	0.316241	0.311423	0.299737		0.199935
	Ce	0.410244	0.400369	0.422852	0.432795	0.420258	0.426363	0.416905	0.425976	0.418821	0.416588	0.392446		0.355992	0.370596	0.373862	0.39319	0.384351	0.3693		0.263795
	Nd	0.104814	0.0905448	0.0918566	0.093768	0.103681	0.0973732	0.0943851	0.100641	0.0992825	0.104019	0.10489		0.0835411	0.0900175	0.0970681	0.100377	0.097715	0.0913926		0.0581014
	Pr	0.0322295	0.0276387	0.0321876	0.0312987	0.0320475	0.0317938	0.0298356	0.0341899	0.0304976	0.0342387	0.031447		0.028259	0.0274466	0.032613	0.0285796	0.0282464	0.0313491		0.0212611
	Sum	8	8	8	8	8	8	8	8	8	8	8		8	8	8	8	8	8		8
	Fe3+/FeT	0.111214	0.0980993	0.0896293	0.115508	0.0851478	0.0806159	0.061016	0.0641222	0.149258	0.129533	0.111435		0.189122	0.0820657	0.0836171	0.0804492	0.0848477	0.12572		0.438455
	ΣREE	0.848264	0.862189	0.893381	0.894815	0.89362	0.907985	0.884729	0.907733	0.881308	0.881075	0.840079		0.757211	0.784811	0.801554	0.838387	0.821736	0.791779		0.543093
	La/Ce	0.733653	0.8583	0.819398	0.778551	0.803397	0.826653	0.824178	0.814426	0.794391	0.7831	0.79322		0.812991	0.800739	0.797117	0.804296	0.810257	0.811637		0.757919
	Allanite II (sample DHS13-42)
	Point No.	71	72	73	74	75	76	77	78	79	80	81	88	89	90	91	92	93	94		82	83	84	85	86	87	95	96	97	98	99	100	101	102	103	104	105	106	107	108
	Zoning	core	core	core	core	core	core	core	core	core	core	core	core	core	core	core	core	core	core		rim	rim	rim	rim	rim	rim	rim	rim	rim	rim	rim	rim	rim	rim	rim	rim	rim	rim	rim	rim
	SiO2	32.206	32.288	31.959	32.37	32.287	32.01	32.704	33.195	32.97	33.01	33.16	32.507	32.946	32.166	32.791	33.207	32.309	32.821		33.621	34.29	33.421	33.701	34.623	33.582	35.1	34.397	34.754	34.957	35.047	35.142	33.491	32.902	33.205	33.325	32.709	33.248	33.578	33.371
	Na2O	0	0	0	0	0	0.016	0	0	0	0	0	0.016	0.001	0.013	0	0	0.091	0.108		0.132	0.094	0.178	0.22	0.186	0.126	0.178	0.149	0.114	0.104	0.117	0.144	0.107	0.124	0.125	0.133	0.135	0.132	0.17	0.205
	CaO	10.12	10.133	9.968	10.463	10.178	10.093	10.851	11.77	11.795	11.511	11.768	11.395	11.919	10.867	11.885	12.272	10.482	10.712		12.275	13.547	12.167	12.116	13.368	12.86	14.444	13.751	14.398	14.949	14.787	14.685	12.377	11.956	12.009	12.131	12.308	12.129	12.365	11.965
	ThO2	0	0	0.006	0	0	0	0.08	0.024	0.047	0	0	0	0	0.042	0.058	0.002	0.924	0.875		0.21	0.177	0.296	0.456	0.08	0.296	0.334	0.045	0.036	0.212	0.119	0.111	0.209	0.402	0.245	0.273	0.215	0.115	0.311	0.53
	P2O5	0.004	0.003	0	0	0	0	0.003	0.02	0.03	0	0	0.024	0.099	0	0.093	0.01	0	0		0.014	0.012	0.019	0.008	0.016	0.019	0.004	0.02	0.011	0.031	0.026	0.019	0.013	0.017	0.016	0.026	0	0.015	0.014	0.021
	FeOT	14.166	14.45	14.656	14.176	14.404	15.565	13.477	13.497	13.697	13.818	13.772	13.819	13.687	13.877	13.754	13.936	13.496	13.275		13.396	12.595	12.952	13.535	12.457	12.947	12.31	12.799	12.252	11.921	11.88	11.959	13.497	13.401	13.765	13.429	13.723	13.332	13.707	13.592
	MnO	0.358	0.344	0.334	0.33	0.418	0.249	0.32	0.424	0.407	0.418	0.44	0.387	0.445	0.408	0.476	0.473	0.348	0.365		0.186	0.217	0.155	0.254	0.272	0.225	0.396	0.216	0.228	0.298	0.358	0.382	0.181	0.122	0.211	0.173	0.15	0.153	0.184	0.182
	MgO	0.088	0.088	0.084	0.076	0.078	0.253	0.08	0.078	0.08	0.079	0.087	0.082	0.066	0.091	0.088	0.078	0.084	0.087		0.189	0.146	0.204	0.165	0.171	0.154	0.128	0.154	0.124	0.087	0.086	0.085	0.156	0.206	0.152	0.221	0.162	0.176	0.17	0.188
	Al2O3	18.341	18.099	17.797	18.531	18.33	17.577	18.801	19.968	19.656	19.327	19.538	19.254	19.941	18.968	19.714	20.017	18.948	19.254		20.196	21.321	20.31	20.097	21.851	21.025	22.273	21.697	22.366	22.667	22.701	22.601	20.237	20.011	19.921	20.129	20.175	20.174	19.988	19.66
	La2O3	6.469	6.583	6.52	6.684	6.582	6.488	5.899	5.227	5.47	6.002	5.797	5.517	5.394	5.637	5.194	5.029	5.401	5.437		5.779	4.458	5.463	5.378	3.922	4.962	3.316	4.324	4.236	3.501	3.433	3.438	5.808	5.74	6.134	5.513	5.599	5.883	5.621	5.977
	Ce2O3	11.728	11.794	12.27	11.517	11.531	11.867	10.696	9.062	9.574	10.278	9.951	10.377	9.877	10.321	9.665	9.459	10.327	9.89		9.71	7.666	9.471	8.919	7.148	8.127	5.999	7.303	7.583	6.669	6.459	6.489	9.536	10.063	9.979	9.375	9.385	9.894	9.078	9.69
	Nd2O3	1.186	0.488	0.51	0.509	0.498	0.401	0.439	0.416	0.433	0.464	0.381	0.477	0.402	0.444	0.488	0.432	0.404	0.451		0.32	0.291	0.329	0.354	0.273	0.324	0.273	0.303	0.274	0.21	0.295	0.284	0.353	0.386	0.3	0.386	0.344	0.353	0.337	0.373
	Pr2O3	4.377	4.438	4.445	4.315	4.396	4.49	4.481	4.088	3.755	3.833	3.799	4.531	4.111	4.323	3.806	3.701	4.355	4.388		3.096	2.777	3.022	2.866	3.038	3.029	2.653	2.881	2.972	2.677	2.578	2.759	2.932	2.966	3.068	2.97	3.003	2.934	2.942	3.034
	Total	99.043	98.708	98.549	98.971	98.702	99.009	97.831	97.769	97.914	98.74	98.693	98.386	98.888	97.157	98.012	98.616	97.169	97.663		99.124	97.591	97.987	98.069	97.405	97.676	97.408	98.039	99.348	98.283	97.886	98.098	98.897	98.296	99.13	98.084	97.908	98.538	98.465	98.788
	Atomic proportions based on 12.5 O and the sum of catios normalized to 8
	Si	3.00819	3.02027	3.00861	3.00748	3.0125	2.98832	3.04038	3.01741	3.00496	3.01155	3.01051	2.98495	2.97905	2.99643	2.98425	2.9866	3.02414	3.04156		3.00648	3.02555	3.01119	3.02569	3.035	2.99367	3.03384	3.00537	2.99205	3.00381	3.01596	3.02179	2.99793	2.98157	2.98739	3.00289	2.95512	2.99382	3.00952	3.01011
	Na	0	0	0	0	0	0.0028961	0	0	0	0	0	0.0028486	0.000175318	0.00234803	0	0	0.0165147	0.0194053		0.0228862	0.0160811	0.031095	0.0382962	0.0316125	0.0217781	0.0298302	0.0252415	0.0190292	0.017327	0.0195215	0.0240078	0.0185707	0.0217869	0.0218047	0.0232366	0.023648	0.0230455	0.0295422	0.0358525
	Ca	1.01281	1.0156	1.00545	1.04159	1.01752	1.00959	1.08088	1.14635	1.15186	1.12522	1.14475	1.12113	1.15477	1.08467	1.15894	1.18262	1.05124	1.06364		1.17611	1.28074	1.17458	1.16553	1.25557	1.22834	1.33768	1.28734	1.32815	1.37636	1.36344	1.35298	1.18711	1.16088	1.15765	1.17124	1.19145	1.17022	1.18745	1.1564
	Th	0	0	0.000128538	0	0	0	0.00169248	0.000496454	0.000974821	0	0	0	0	0.000890356	0.0012012	4.09341e-05	0.0196815	0.0184527		0.0042734	0.00355399	0.006069	0.00931652	0.00159585	0.00600477	0.00656959	0.000894739	0.0007053	0.00414554	0.00233039	0.00217204	0.00425742	0.00829001	0.00501604	0.00559807	0.00442032	0.00235649	0.00634321	0.0108792
	P	0.000316302	0.000237574	0	0	0	0	0.000236114	0.00153909	0.00231481	0	0	0.00186571	0.00757853	0	0.00716535	0.000761416	0	0		0.00105986	0.000896379	0.00144926	0.000608059	0.00118738	0.00143392	0.000292698	0.00147938	0.000801736	0.00225514	0.00189418	0.00138314	0.000985169	0.0013042	0.00121866	0.00198343	0	0.00114347	0.00106229	0.00160364
	Fe2+	0.95543	0.965613	0.964868	0.929391	0.951096	0.918046	0.925379	0.831412	0.816419	0.84328	0.820155	0.820528	0.796109	0.863127	0.79221	0.75906	0.920237	0.916892		0.751699	0.682572	0.744157	0.752706	0.677634	0.69319	0.598163	0.635357	0.595611	0.56862	0.582469	0.587009	0.745369	0.750813	0.757119	0.751846	0.687498	0.746861	0.734763	0.756911
	Fe3+	0.151167	0.164822	0.189017	0.172115	0.172877	0.297197	0.12246	0.194644	0.227623	0.211015	0.225517	0.240699	0.238928	0.217999	0.254632	0.289173	0.136234	0.111963		0.250131	0.246836	0.231793	0.26357	0.235594	0.272055	0.29168	0.299884	0.286537	0.288065	0.272522	0.272999	0.265051	0.264806	0.278584	0.260162	0.34938	0.257123	0.292675	0.26843
	Mn	0.0283234	0.0272557	0.0266326	0.0259698	0.0330347	0.0196895	0.0251983	0.0326453	0.0314202	0.0323009	0.0338355	0.0300999	0.0340824	0.0321931	0.0366929	0.0360333	0.02759	0.0286505		0.0140882	0.0162177	0.0118289	0.0193157	0.0201956	0.0169893	0.0289918	0.0159855	0.0166262	0.0216895	0.0260947	0.0278224	0.0137235	0.00936432	0.0160792	0.0132041	0.0114787	0.0116693	0.0139686	0.0139053
	Mg	0.0122536	0.0122716	0.0117887	0.0105266	0.0108495	0.0352109	0.0110874	0.0105699	0.0108699	0.0107445	0.011775	0.011225	0.0088968	0.0126376	0.0119393	0.0104582	0.0117212	0.0120193		0.0251955	0.0192045	0.0274008	0.0220841	0.0223463	0.020466	0.0164934	0.0200591	0.0159148	0.0111448	0.0110328	0.0108961	0.0208177	0.0278294	0.0203867	0.0296876	0.0218191	0.0236258	0.0227146	0.0252805
	Al	2.01905	1.99533	1.97459	2.02915	2.01566	1.93394	2.05999	2.1392	2.11141	2.07809	2.09056	2.08371	2.1251	2.0825	2.11452	2.1218	2.09025	2.10292		2.12848	2.21718	2.15668	2.12652	2.25747	2.20897	2.26893	2.23426	2.26939	2.29556	2.30237	2.29045	2.13499	2.13721	2.1123	2.1377	2.14822	2.14096	2.11139	2.09003
	La	0.222866	0.227126	0.226391	0.229052	0.226515	0.223404	0.202276	0.175248	0.183885	0.201966	0.194119	0.186854	0.179898	0.193684	0.17435	0.166828	0.186462	0.185842		0.190607	0.145083	0.181547	0.178091	0.126806	0.163152	0.105715	0.139348	0.134511	0.110961	0.108965	0.109039	0.19176	0.191855	0.20355	0.18323	0.186577	0.195388	0.185821	0.198855
	Ce	0.401065	0.403913	0.422903	0.391761	0.393902	0.405607	0.364058	0.301583	0.319474	0.343301	0.330761	0.348862	0.326981	0.352007	0.322036	0.31147	0.353895	0.335555		0.317899	0.247644	0.312419	0.293171	0.229404	0.265247	0.189839	0.233615	0.239016	0.209808	0.203499	0.204285	0.312523	0.333866	0.328698	0.309288	0.310431	0.326178	0.297889	0.320007
	Nd	0.0395632	0.0163028	0.0171468	0.0168895	0.0165946	0.0133698	0.0145757	0.013505	0.0140944	0.0151182	0.0123535	0.0156429	0.012982	0.0147717	0.0158613	0.0138762	0.0135051	0.0149266		0.0102196	0.00916998	0.0105865	0.0113507	0.00854665	0.0103153	0.00842726	0.00945494	0.00842469	0.00644461	0.00906641	0.00872157	0.0112851	0.0124925	0.00963936	0.0124221	0.0110996	0.011352	0.0107872	0.012016
	Pr	0.148963	0.151261	0.152468	0.146075	0.149448	0.152729	0.151788	0.135396	0.124699	0.127414	0.125669	0.151596	0.135443	0.146733	0.126207	0.121283	0.148525	0.148165		0.100875	0.0892784	0.0992081	0.0937545	0.0970323	0.0983855	0.0835519	0.091718	0.0932282	0.0838148	0.0808336	0.0864417	0.0956294	0.0979326	0.100572	0.0975123	0.0988548	0.0962619	0.0960769	0.0997156
	Sum	8	8	8	8	8	8	8	8	8	8	8	8	8	8	8	8	8	8		8	8	8	8	8	8	8	8	8	8	8	8	8	8	8	8	8	8	8	8
	Fe3+/FeT	0.136605	0.145804	0.163809	0.156254	0.153809	0.244557	0.116869	0.189701	0.218021	0.200148	0.215667	0.226812	0.23084	0.20164	0.243238	0.275867	0.128952	0.108823		0.249674	0.265584	0.237505	0.259349	0.257979	0.281851	0.327789	0.320649	0.324818	0.336255	0.318742	0.317438	0.262318	0.260734	0.268981	0.257075	0.336954	0.256103	0.284859	0.261796
	ΣREE	0.812457	0.798602	0.818909	0.783778	0.78646	0.79511	0.732698	0.625732	0.642153	0.687799	0.662903	0.702954	0.655304	0.707196	0.638454	0.613457	0.702388	0.684489		0.6196	0.491175	0.60376	0.576367	0.461789	0.5371	0.387534	0.474136	0.475181	0.411028	0.402364	0.408488	0.611198	0.636146	0.642459	0.602452	0.606962	0.62918	0.590574	0.630593
	La/Ce	0.555686	0.562314	0.535327	0.584674	0.575052	0.55079	0.555614	0.581092	0.575586	0.588307	0.586885	0.535609	0.550177	0.550228	0.541398	0.535615	0.526886	0.553834		0.599584	0.585852	0.581101	0.607465	0.552764	0.615096	0.556868	0.596487	0.562771	0.528869	0.535458	0.533758	0.613588	0.574647	0.61926	0.592425	0.601025	0.599023	0.623792	0.621407
	Allanite III (sample DHS10-74)
	Point No.	27	28	29	30	31	32	33	34	35	36	64	65			1	2	4	6	7	8	11	12	16	44	45	46	47	48	49	50	51	52	66	67	3	5	9	10	13	14	15	39	40	41	42	43	68	69
	Zoning	core	core	core	core	core	core	core	core	core	core	core	core			rim1	rim1	rim1	rim1	rim1	rim1	rim1	rim1	rim1	rim1	rim1	rim1	rim1	rim1	rim1	rim1	rim1	rim1	rim1	rim1	rim1	rim1	rim1	rim1	rim1	rim1	rim1	rim1	rim1	rim1	rim1	rim1	rim1	rim1
	SiO2	31.983	31.927	31.545	31.595	31.786	31.51	31.567	31.385	31.818	31.896	31.91	31.607			31.511	32.089	31.818	32.443	31.586	31.399	31.482	31.65	31.9	32.998	32.543	32.794	31.825	31.932	31.363	31.961	32.02	32.398	32.19	32.135	32.353	32.716	32.337	32.554	32.555	32.129	32.199	32.838	33.098	33.193	33.523	32.84	32.974	32.913
	Na2O	0	0	0	0	0.007	0	0	0	0	0.037	0	0			0	0.009	0	0	0	0	0	0	0	0.001	0.011	0.058	0	0	0	0.001	0	0	0	0	0.034	0	0.022	0.042	0.044	0.022	0.007	0	0.001	0.036	0.001	0.064	0.037	0.004
	CaO	10.037	9.96	9.14	9.308	9.374	9.583	9.322	9.359	9.251	9.295	9.412	9.426			10.267	11.181	10.027	10.786	10.168	10.118	10.031	9.781	9.72	11.988	11.143	11.521	9.99	9.953	10.043	10.263	10.008	10.796	10.164	10.346	12	11.649	11.58	11.884	11.282	11.276	11.392	11.282	11.935	11.714	12.498	11.404	11.204	11.515
	ThO2	0	0	0	0.023	0	0.001	0.004	0.06	0.033	0.015	0.04	0.036			0	0	0	0	0	0.022	0.021	0	0	0	0.015	0.008	0	0.095	0	0.001	0	0.009	0	0	0	0.108	0	0.016	0.013	0	0	0.04	0	0	0.03	0.054	0	0
	P2O5	0	0.006	0.024	0	0	0.026	0.024	0	0.011	0.008	0.057	0.006			0.228	0.152	0.061	0.116	0.054	0.179	0.092	0.052	0.042	0.283	0.249	0.434	0.024	0.094	0.115	0.088	0.071	0.041	0.006	0.025	0.25	0.177	0.221	0.331	0.293	0.199	0.132	0.048	0.314	0.179	0.064	0.468	0.2	0.128
	FeOT	14.969	15.017	16.135	15.965	15.428	16.406	15.499	18.67	16.32	15.25	15.391	15.621			13.889	13.517	14.598	13.517	14.251	14.038	14.255	14.398	15.008	13.438	13.412	12.904	14.212	14.334	14.637	14.364	14.152	13.666	14.59	14.937	13.149	12.613	13.735	12.957	13.305	13.871	13.075	14.104	13.588	13.587	13.017	13.268	13.746	14.242
	MnO	0.069	0.066	0.155	0.042	0.014	0.069	0.081	0.088	0.015	0.006	0.419	0.091			0.572	0.508	0.342	0.462	0.458	0.356	0.41	0.422	0.665	0.296	0.457	0.35	0.145	0.233	0.287	0.25	0.243	0.349	0.385	0.447	0.439	0.657	0.188	0.381	0.466	0.339	0.494	0.332	0.291	0.366	0.39	0.267	0.259	0.445
	MgO	0.214	0.153	0.496	0.49	0.594	0.207	0.604	0.12	0.454	0.575	0.367	0.542			0.06	0.16	0.313	0.11	0.106	0.259	0.163	0.445	0.105	0.059	0.081	0.452	0.52	0.476	0.272	0.242	0.452	0.044	0.175	0.091	0.128	0.053	0.409	0.052	0.103	0.153	0.041	0.108	0.175	0.199	0.148	0.432	0.524	0.057
	Al2O3	17.197	17.069	15.522	15.856	16.274	15.193	16.092	13.477	15.543	16.455	16.731	15.972			18.557	19.233	17.352	18.806	17.764	17.777	17.894	17.407	17.585	19.236	19.292	19.454	17.696	17.696	17.701	17.889	17.788	18.427	17.902	17.605	20.232	20.254	18.697	19.57	18.986	18.47	19.69	18.592	19.325	19.461	20.15	19.221	18.886	18.795
	La2O3	8.76	8.331	8.622	8.84	9.104	9.2	9.339	8.52	8.256	9.272	8.021	8.408			7.375	7.153	7.598	7.501	8.019	6.981	7.916	7.128	7.311	6.913	7.102	6.731	7.751	7.435	7.098	8.158	7.315	7.056	8.465	7.882	6.589	6.686	6.826	6.485	6.952	7.285	6.953	7.246	7.053	6.847	6.737	6.825	7.338	7.509
	Ce2O3	13.283	13.15	14.329	14.036	14.025	13.936	13.453	15.027	14.585	13.641	13.829	15.006			12.358	11.217	12.465	11.173	12.088	11.503	12.499	11.839	12.351	10.01	10.55	10.331	11.949	12.308	11.417	12.252	11.925	11.059	12.546	11.677	9.857	10.672	10.774	10.126	10.508	11.091	10.737	10.63	10.606	9.97	9.341	10.383	11.046	11.129
	Nd2O3	0.515	0.456	0.473	0.458	0.462	0.44	0.477	0.473	1.161	0.249	0.503	0.482			0.466	0.416	0.451	0.429	0.462	0.446	0.461	0.532	0.489	0.342	0.33	0.354	1.096	0.397	0.462	0.397	1.062	0.413	0.438	0.407	0.41	0.368	0.447	0.436	0.372	0.397	0.382	0.411	0.331	0.398	0.367	0.976	0.416	0.331
	Pr2O3	3.907	3.931	3.751	3.498	3.622	3.816	3.658	3.525	4.085	3.415	4.065	3.62			3.691	3.324	3.746	3.679	3.533	3.86	3.571	3.884	3.904	3.177	3.43	3.334	3.803	4.161	3.757	3.356	3.933	3.929	3.449	3.653	3.121	3.322	3.077	3.316	3.204	3.202	3.367	3.644	3.325	3.522	3.159	3.368	3.481	3.448
	Total	100.934	100.066	100.192	100.111	100.69	100.387	100.12	100.704	101.532	100.114	100.745	100.817			98.974	98.959	98.771	99.022	98.489	96.938	98.795	97.538	99.08	98.741	98.615	98.725	99.011	99.114	97.152	99.222	98.969	98.187	100.31	99.205	98.562	99.275	98.313	98.15	98.083	98.434	98.469	99.275	100.042	99.472	99.425	99.57	100.111	100.516
	Atomic proportions based on 12.5 O and the sum of catios normalized to 8
	Si	2.98895	3.00325	3.00504	3.00132	2.99864	3.00679	2.99403	3.01507	3.00553	3.01282	2.9953	2.98956			2.94767	2.95204	2.99742	3.00144	2.98112	2.98582	2.96735	3.00283	2.99663	3.00573	2.99145	2.9841	2.98827	2.99287	2.97615	2.98832	3.00095	3.02288	2.99087	3.00132	2.934	2.96939	2.97321	2.97919	3.00243	2.97621	2.96049	3.01388	2.98802	3.00143	3.00151	2.98186	2.99279	2.98836
	Na	0	0	0	0	0.00128038	0	0	0	0	0.00677626	0	0			0	0.00160532	0	0	0	0	0	0	0	0.00017661	0.00196051	0.0102329	0	0	0	0.000181284	0	0	0	0	0.00597829	0	0.00392193	0.00745238	0.0078679	0.00395131	0.00124788	0	0.000175038	0.00631154	0.0001736	0.0112672	0.00651115	0.000704169
	Ca	1.00504	1.00386	0.932924	0.947394	0.947531	0.979798	0.947356	0.963352	0.936306	0.940733	0.946621	0.955283			1.02906	1.10212	1.01211	1.06918	1.02826	1.03092	1.01305	0.994308	0.978338	1.17001	1.09751	1.12329	1.00507	0.999532	1.02113	1.02816	1.005	1.07931	1.01186	1.03535	1.16603	1.13286	1.14081	1.1653	1.11486	1.11919	1.12228	1.10947	1.15448	1.13492	1.199	1.10949	1.08958	1.12024
	Th	0	0	0	0.000497197	0	2.17151e-05	8.63356e-05	0.00131169	0.000709364	0.000322429	0.000854437	0.000774878			0	0	0	0	0	0.000476078	0.000450436	0	0	0	0.000313778	0.000165659	0	0.00202625	0	2.12772e-05	0	0.000191096	0	0	0	0.00223068	0	0.000333212	0.000272838	0	0	0.000835441	0	0	0.000611259	0.0011158	0	0
	P	0	0.000477814	0.00193555	0	0	0.0021004	0.00192712	0	0.00087966	0.000639735	0.00452962	0.000480451			0.0180561	0.0118381	0.00486496	0.00908532	0.00431473	0.0144104	0.00734123	0.00417671	0.00334014	0.0218234	0.0193775	0.0334336	0.00190781	0.00745871	0.00923867	0.00696568	0.0056334	0.00323862	0.000471957	0.00197674	0.0191938	0.0136005	0.0172025	0.0256446	0.0228768	0.0156061	0.0102747	0.00372962	0.0239986	0.0137028	0.00485122	0.0359753	0.0153677	0.00983897
	Fe2+	0.948631	0.973632	0.993037	0.98165	0.963886	0.996187	0.958707	1.02868	1.00656	0.978683	0.973922	0.952296			0.90103	0.808862	0.923799	0.899057	0.909968	0.918813	0.913796	0.920022	0.957352	0.848164	0.882411	0.819092	0.902688	0.925276	0.911952	0.920218	0.924778	0.916534	0.925414	0.921894	0.743383	0.808282	0.788253	0.813983	0.867289	0.832606	0.812171	0.872115	0.835386	0.826426	0.763147	0.843896	0.830111	0.844454
	Fe3+	0.221313	0.207749	0.292428	0.286687	0.253337	0.313082	0.27071	0.471315	0.2827	0.226018	0.234318	0.283381			0.185547	0.231103	0.226317	0.146776	0.214905	0.197605	0.209895	0.222415	0.221713	0.175531	0.148668	0.162921	0.21335	0.1983	0.249664	0.202978	0.184471	0.14986	0.208306	0.244837	0.253882	0.149131	0.267898	0.177698	0.158937	0.241993	0.193222	0.210475	0.190526	0.201064	0.211574	0.163647	0.213295	0.237002
	Mn	0.00546189	0.00525862	0.0125068	0.00337938	0.00111869	0.00557696	0.00650733	0.00716064	0.00120015	0.000480045	0.0333136	0.00729054			0.0453217	0.0395844	0.0272895	0.036203	0.0366138	0.0286743	0.0327329	0.0339128	0.0529125	0.0228375	0.0355824	0.0269763	0.0115322	0.0184975	0.0230682	0.0197989	0.0192903	0.0275818	0.0302993	0.035362	0.0337214	0.0505088	0.0146412	0.0295334	0.0364028	0.0265987	0.0384718	0.0258096	0.022252	0.0280322	0.0295771	0.0205348	0.0199112	0.0342231
	Mg	0.0298145	0.0214555	0.0704393	0.0693911	0.0835389	0.0294469	0.0854033	0.0171858	0.063932	0.080969	0.0513563	0.0764254			0.00836723	0.0219432	0.0439576	0.015171	0.0149144	0.0367166	0.0229039	0.0629407	0.0147043	0.00801178	0.0111	0.0613158	0.0727895	0.0665094	0.0384788	0.0337316	0.0631526	0.00612025	0.0242398	0.0126704	0.017305	0.00717129	0.0560613	0.00709434	0.0141614	0.0211287	0.00561978	0.014777	0.0235523	0.0268255	0.0197548	0.0584767	0.0709006	0.00771533
	Al	1.89412	1.89234	1.7427	1.77518	1.80942	1.70865	1.79883	1.52589	1.73037	1.83185	1.85094	1.78049			2.04588	2.0853	1.92655	2.05051	1.97598	1.99234	1.98779	1.94642	1.94689	2.06506	2.09006	2.08634	1.95831	1.95476	1.97967	1.97129	1.96481	2.02634	1.96036	1.93788	2.16243	2.16658	2.02607	2.11077	2.06369	2.01646	2.13365	2.01109	2.05616	2.07397	2.12632	2.05692	2.02023	2.01124
	La	0.301955	0.289048	0.302947	0.309731	0.316781	0.323803	0.32671	0.301893	0.287645	0.323034	0.277703	0.293329			0.254459	0.242713	0.264006	0.255957	0.279154	0.244853	0.275202	0.249439	0.253313	0.232257	0.240793	0.225911	0.26844	0.257029	0.248435	0.281339	0.252867	0.242828	0.290097	0.271525	0.220396	0.223827	0.231489	0.218899	0.236485	0.248906	0.235794	0.245294	0.234852	0.22836	0.222486	0.228574	0.245652	0.25147
	Ce	0.454483	0.452879	0.499755	0.488157	0.48441	0.486872	0.467159	0.52853	0.504402	0.471742	0.475255	0.51965			0.42324	0.377803	0.429922	0.378443	0.417698	0.400481	0.431325	0.411239	0.424782	0.333825	0.355058	0.344179	0.410776	0.422349	0.396654	0.419408	0.409184	0.377781	0.426781	0.39929	0.327275	0.35463	0.362681	0.339277	0.354811	0.376148	0.361432	0.357194	0.350555	0.330064	0.306205	0.345167	0.367055	0.369951
	Nd	0.0171888	0.0153192	0.0160923	0.0155381	0.0155657	0.014995	0.0161577	0.0162284	0.0391669	0.00839991	0.0168624	0.0162821			0.0155683	0.0136678	0.0151737	0.0141744	0.0155728	0.0151468	0.0155184	0.0180263	0.0164055	0.0111257	0.0108337	0.0115043	0.0367536	0.013289	0.0156574	0.0132567	0.0355469	0.0137623	0.0145342	0.0135759	0.0132791	0.0119287	0.0146782	0.0142502	0.0122528	0.013134	0.0125436	0.0134719	0.0106721	0.012853	0.0117355	0.03165	0.0134845	0.0107333
	Pr	0.133038	0.134732	0.130197	0.121073	0.1245	0.132677	0.126416	0.123387	0.140596	0.117533	0.13903	0.124757			0.125804	0.11142	0.128581	0.124014	0.121496	0.133743	0.12264	0.134267	0.133624	0.105442	0.114882	0.11054	0.13011	0.1421	0.129901	0.114331	0.134306	0.133573	0.116763	0.124314	0.103127	0.10986	0.103083	0.110571	0.107667	0.108074	0.112797	0.12186	0.109372	0.116039	0.103058	0.111427	0.115118	0.114069
	Sum	8	8	8	8	8	8	8	8	8	8	8	8			8	8	8	8	8	8	8	8	8	8	8	8	8	8	8	8	8	8	8	8	8	8	8	8	8	8	8	8	8	8	8	8	8	8
	Fe3+/FeT	0.189165	0.175853	0.227488	0.226034	0.208127	0.239127	0.220194	0.314211	0.219273	0.187613	0.193933	0.229332			0.170763	0.222222	0.196778	0.140344	0.191048	0.176999	0.186791	0.194685	0.188041	0.171468	0.144187	0.165905	0.191167	0.17649	0.214928	0.180715	0.166303	0.14053	0.183736	0.209849	0.254578	0.155765	0.253655	0.179189	0.154875	0.225194	0.192186	0.194418	0.185714	0.195685	0.217061	0.162422	0.204422	0.219151
	ΣREE	0.906665	0.891978	0.948991	0.934499	0.941257	0.958347	0.936442	0.970038	0.971811	0.92071	0.90885	0.954019			0.819071	0.745603	0.837683	0.772588	0.833921	0.794223	0.844685	0.812971	0.828125	0.682649	0.721567	0.692134	0.84608	0.834767	0.790648	0.828334	0.831904	0.767945	0.848174	0.808704	0.664078	0.700246	0.711932	0.682997	0.711215	0.746262	0.722567	0.73782	0.705451	0.687317	0.643484	0.716818	0.74131	0.746223
	La/Ce	0.664392	0.638246	0.60619	0.634491	0.653952	0.665068	0.699355	0.571194	0.570269	0.684768	0.584325	0.564474			0.601216	0.642433	0.614078	0.676341	0.668317	0.611397	0.638039	0.606554	0.596336	0.695743	0.67818	0.656378	0.653496	0.608569	0.626326	0.6708	0.617977	0.642775	0.679733	0.68002	0.673428	0.631157	0.638272	0.645191	0.666509	0.661722	0.652388	0.686723	0.669944	0.691866	0.72659	0.662211	0.669251	0.679739
[truncated: 24 more columns]

## Sheet: Table S2
Table S2. SHRIMP U-Pb data for type I allanite (DHS13-43) from mineralized IASD in Dahongshan
	DHS13-43																					References
	Spot Name	ppm Th	ppm U	Th/U	f206 (%)	208Pb*/232Th	2σ	207Pb*/206Pb*	2σ	207Pb*/235U	2σ	206Pb*/238U	2σ	err. corr.	207Pb/235U date (Ma)	2σ	206Pb/238U date (Ma)	2σ	comment			Spot Name	Th	U	Th/U	f206 (%)	f208 (%)	208Pb*/232Th	1s %	207Pb*/206Pb*	1s %	207Pb*/235U	1s %	206Pb*/238U	1s %	err. corr.	206Pb/238U date (Ma)	1s err	208Pb/232Th date (Ma)	1s err	Comment
	1807A.1-2	60.2735	86.7976	1.44006	0.830456	0.0506414	0.00325617	0.0699472	0.00799522	1.55961	0.209338	0.161712	0.0113786	0.524219	954.312	83.2292	966.286	63.1406	core			ALBUR (1456 ± 23 Ma)
	1807D.1-1	53.0141	5.298	0.0999357	-1.52584e-09	0.0667081	0.0146013	0.0747257	0.00318033	1.62336	0.145088	0.157559	0.0123828	0.87934	979.292	56.2145	943.198	68.9594	rim			ALBUR.1-1	7187.56	168.904	42.5542	7.08932	1.38757	0.0785412	1.93516	0.0996875	5.66783	3.92035	6.34287	0.285222	2.8474	0.448913	1617.61	40.7353	1528.23	28.4834	outlier
	1807D.1-2	44.9679	35.7647	0.795338	0.197681	0.0544183	0.00474236	0.0786055	0.00683435	1.71243	0.203224	0.158	0.0127624	0.680632	1013.19	76.2187	945.654	71.0465	core			ALBUR.1-2	7935.2	173.718	45.6785	6.06774	1.08555	0.0743076	1.74658	0.0928462	5.10978	3.43528	5.72817	0.268347	2.58883	0.451948	1532.41	35.3087	1448.74	24.4179
	1807D.1-3	57.9209	145.309	2.50875	0.723055	0.0505124	0.00230487	0.0695463	0.00630586	1.451	0.167202	0.151319	0.0107607	0.617129	910.289	69.3747	908.352	60.2508	core			ALBUR.1-3	7614.94	174.574	43.6201	10.0698	2.5025	0.0752308	1.06216	0.0970583	6.12203	4.56877	6.71249	0.341401	2.75288	0.410113	1893.41	45.166	1466.1	15.021
	1807D.1-5	63.6484	14.9896	0.235507	2.04077	0.0677344	0.0170644	0.07812	0.0117652	1.63617	0.27171	0.151902	0.0106289	0.421353	984.238	105.029	911.618	59.4827	rim			ALBUR.1-4	8371.83	177.442	47.1807	6.46269	1.27731	0.0736822	1.76035	0.106565	4.11027	4.40481	4.77018	0.299785	2.4208	0.507485	1690.24	35.9928	1436.97	24.4175
	1807D.1-6	28.6982	0.818688	0.0285275	1.82279	-0.0929068	0.170715	0.0625777	0.0125973	1.36293	0.304769	0.157962	0.0153786	0.435379	873.13	131.697	945.441	85.6133	rim			ALBUR.1-5	9317.42	192.512	48.3992	7.01624	1.19496	0.070871	1.66176	0.0905415	6.51741	3.20575	8.07567	0.256792	4.76862	0.590493	1473.41	62.81	1383.98	22.2287	outlier
	Rejected analyses																					ALCAL (109.8 ± 2.2 Ma)
	1807A.1-1	63.3982	8.49199	0.133947	-0.783865	0.131882	0.0750294	0.0801652	0.00606141	1.97599	0.635383	0.178771	0.0558723	0.97196	1107.35	220.175	1060.26	305.552	rim			ALCAL.1-1	23467.9	1101.58	21.3039	14.1703	4.37709	0.00544483	1.73588	0.0503163	33.7737	0.111239	33.8783	0.0160342	2.6596	0.0785046	102.543	2.70567	109.754	1.90003
	1807D.1-4	5.22966	0.10959	0.0209555	-1.85736	4.61043	14.9004	0.0992486	0.0185107	20.3623	30.9505	1.488	2.24464	0.992443	3108.73	–	5875.76	5815.89	rim			ALCAL.1-2	23428.8	1118.63	20.9442	11.3077	3.58955	0.00551717	2.322	0.0756436	18.0309	0.17544	18.2509	0.0168211	2.82523	0.154799	107.534	3.01289	111.208	2.57516
	Notes:	Pb* denotes radiogenic Pb;																				ALCAL.1-3	23905.2	1131.33	21.1302	10.7134	3.34292	0.00542187	1.9931	0.0751155	17.6541	0.170496	17.8066	0.016462	2.32573	0.13061	105.257	2.42811	109.292	2.17242
		Conventional 204Pb method was adopted for common Pb corrections for allanite referrences;																				ALCAL.1-4	24281.4	1125.82	21.5676	11.8905	3.68443	0.00542197	1.9599	0.0659803	20.6683	0.15033	20.799	0.0165246	2.32849	0.111952	105.654	2.44009	109.294	2.13627
		f206 is the common 206Pb proportion in total 206Pb, determined using the measured 204Pb/206Pb and a common Pb composition from the Stacey-Kramers (1975) at approximate age of the sample.																				ALCAL.1-5	25855.5	1170.39	22.0915	13.483	4.23715	0.00516375	2.10735	0.0554389	20.5267	0.123426	20.6181	0.016147	1.93949	0.0940675	103.259	1.98674	104.102	2.18816	outlier
																						Notes:	Pb* denotes radiogenic Pb;
																							Conventional 204Pb method was adopted for common Pb corrections for allanite referrences;
																							f206 is the common 206Pb proportion in total 206Pb; f208 is the common 208Pb proportion in total 208Pb;
																							Mean 208Pb/232Th dates reported as the ages of references ALBUR and ALCAL;
																							Both ALBUR and ALCAL show uniform Th/U ratios and contain a relatively high f206 and relatively low f208, and thus their Th-Pb ages are better regard as more reliable ages;
																							Two in-house allanite references have best estimated ages of 1442 ± 5.6 Ma and 108.2 ± 1.1 Ma at 1sigma, respectively;
																							Outliers were precluded for mean age calculations.
																							Allanite was analyzed during the same session with those reported in Su et al (2021).

## Sheet: Table S3
Table S3. SHRIMP U-Pb data for monazite in metasomatic rocks in Dahongshan
																									References
	Spot Name	ppm Th	ppm U	Th/U	f206 (%)	208Pb*/232Th	2σ	207Pb*/206Pb*	2σ	207Pb*/235U	2σ	206Pb*/238U	2σ	err. corr.	207Pb/235U date (Ma)	2σ	206Pb/238U date (Ma)	2σ	Disc.(%)	comment					Spot Name	ppm Th	ppm U	Th/U	f206 (%)	208Pb*/232Th	1σ	207Pb*/206Pb*	1σ	207Pb*/235U	1σ	206Pb*/238U	1σ	err. corr.	207Pb/206Pb date (Ma)	1σ
	DHS13-60 Mon I																								Z2908 (1796 ± 5 Ma; 1σ)
	1802D1-1	5030	96.5856	52.0782	1.27031	0.0582795	0.00481093	0.0604338	0.0103424	1.47537	0.270245	0.17706	0.012342	0.380548	920.333	110.963	1050.89	67.4171	12.4236	relic core					2908.1-1	15848.9	2184.93	7.25377	0.0203309	0.0915341	0.00482052	0.109084	0.00193116	4.44762	0.190459	0.295709	0.0115303	0.910545	1784.18	32.2709
																									2908.1-2	18341	2285.82	8.02384	0.0193012	0.0848925	0.00421003	0.109022	0.000479319	4.64751	0.149956	0.309176	0.00988282	0.990673	1783.13	8.01536
	1802D1-2R	6399.92	580.942	11.0165	0.0890501	0.0487893	0.00403031	0.0671961	0.00158238	1.40378	0.0957561	0.151515	0.00968655	0.903875	890.535	40.4538	909.448	54.1136	2.07962	rim1					2908.1-3	21381.3	2553.68	8.37274	0.0270265	0.0834271	0.00367255	0.109371	0.000847322	4.57359	0.146691	0.303287	0.00943945	0.970389	1788.96	14.1139
	1802D1-3	7197.11	946.854	7.60108	0.0964594	0.0496178	0.00419825	0.0667883	0.0013893	1.4231	0.100236	0.154538	0.0103941	0.954914	898.664	42.0092	926.35	57.9057	2.98876	rim1					2908.1-4	17046.2	1965.46	8.67287	0.0347461	0.0930412	0.00410172	0.110582	0.000470034	5.01029	0.153587	0.328609	0.00997598	0.99034	1808.99	7.72462
	1802D2-1	4317.74	426.937	10.1133	0.0166463	0.0511217	0.00438844	0.0685488	0.00175184	1.47063	0.108001	0.155598	0.0107151	0.937716	918.389	44.3934	932.266	59.6354	1.48857	rim1					2908.1-5	20775.5	2532.66	8.20304	0.0176017	0.0833979	0.00379012	0.109268	0.0004439	4.56742	0.160768	0.303163	0.0105997	0.993317	1787.25	7.40258
	1802D2-2	6570.41	812.318	8.08847	0.0343597	0.0498127	0.00426264	0.0675676	0.00129454	1.42916	0.103462	0.153405	0.0107103	0.964407	901.198	43.2535	920.024	59.7217	2.04624	rim1					2908.2-1	22900.1	1409.39	16.2483	0.0494653	0.0890513	0.00426732	0.107745	0.000991195	4.87839	0.271825	0.328381	0.0180464	0.986277	1761.63	16.8163
																									2908.2-2	8085.75	895.337	9.03095	0.0245942	0.102667	0.00441255	0.110006	0.000726931	5.21143	0.16711	0.34359	0.0107811	0.978535	1799.5	12.0231
	1802B.1-1	8693.07	527.094	16.4925	0.183723	0.0414774	0.00388603	0.0666075	0.00354029	1.23236	0.11284	0.134188	0.0100607	0.818828	815.413	51.3358	811.711	57.0561	-0.455957	rim2					2908.2-3	9221.8	745.909	12.3632	0.0764916	0.102745	0.00460705	0.107962	0.000891686	5.21206	0.190402	0.350136	0.0124596	0.974107	1765.31	15.0907
	1802B1-2	8659.01	760.097	11.392	0.314101	0.0375906	0.00353535	0.0639508	0.00354701	1.13325	0.124914	0.128522	0.0123232	0.869876	769.301	59.4736	779.429	70.2017	1.29945	rim2					2908.2-4	23126.8	2421.11	9.55216	0.00749004	0.0872426	0.00386941	0.110152	0.00036786	4.69741	0.177685	0.309289	0.0116535	0.996095	1801.92	6.07431
	1802B1-3	9022.69	685.232	13.1674	0.0915264	0.0424911	0.0038032	0.0659804	0.00240071	1.27766	0.107263	0.140443	0.0106572	0.903875	835.813	47.8266	847.168	60.0998	1.34034	rim2					2908.2-6	22780.7	2812.03	8.10116	0.0230339	0.091225	0.00394404	0.110129	0.000297139	4.88025	0.150982	0.321397	0.00990527	0.99619	1801.53	4.90781
	Rejected																								Z2243 (1038 ± 21 Ma; 1σ)
	1802D1-2	6210.71	584.848	10.6193	-0.0185745	0.0340138	0.0106229	0.0670494	0.00197099	1.55335	0.357148	0.168025	0.0386295	0.999925	951.828	142.258	1001.22	211.456	4.93331	rim1					2234.1-1	2552.01	160.989	15.852	0.255607	0.0473329	0.00209314	0.0728727	0.00250618	1.60624	0.0721036	0.159861	0.00461203	0.64269	1010.42	69.7323
																									2234.1-2	2621.58	170.612	15.3657	0.374876	0.0479455	0.0020738	0.0748938	0.00345991	1.67409	0.104213	0.162118	0.00676435	0.67027	1065.65	92.893
	DHS15-71 Mon II																								2234.2-1	12075.2	135.412	89.1734	1.2319	0.0478493	0.00205549	0.0672082	0.00454669	1.56279	0.115389	0.168647	0.00498855	0.400621	844.233	140.753
	1802G1-1	3212.18	296.814	10.8222	-0.140182	0.0482779	0.00403663	0.06558	0.00305705	1.54145	0.17485	0.170473	0.0177477	0.917798	947.083	69.8854	1014.72	97.377	6.66551	relic core					2234.2-2	17097.2	150.695	113.456	0.408354	0.0508395	0.00225812	0.0757301	0.00264902	1.75147	0.0788834	0.167738	0.00475881	0.629917	1087.95	70.1025
																									2234.2-3	5372.62	141.707	37.9135	0.214496	0.050232	0.00228196	0.0743806	0.00218542	1.75192	0.0809034	0.170825	0.00608605	0.77149	1051.81	59.2028
	1802E1-2	16205.7	1385.57	11.6961	0.18032	0.0438681	0.0044482	0.0666842	0.00128488	1.31892	0.093406	0.143448	0.00977011	0.96172	854.041	40.9051	864.131	54.9636	1.16766	core					2234.2-4	5757.53	169.809	33.9059	0.0598016	0.0481021	0.00230415	0.0765876	0.0016607	1.82334	0.0687441	0.172666	0.00532554	0.818065	1110.47	43.3106
	1802E1-3	7179.52	1404.38	5.11223	0.0128092	0.0468109	0.0040854	0.0678957	0.00106944	1.37048	0.0966754	0.146396	0.0100612	0.974267	876.368	41.4162	880.727	56.4525	0.494961	core					2234.2-5	5440.25	155.88	34.9003	0.260223	0.0510093	0.00232929	0.0728707	0.0028695	1.76034	0.0933799	0.175204	0.00622724	0.670033	1010.36	79.8442
	1802H1-2R	17377.3	1109.52	15.6621	0.0248936	0.0460246	0.00739497	0.0680444	0.00120808	1.31279	0.092164	0.139927	0.00949736	0.966797	851.354	40.468	844.251	53.5971	-0.84127	core					2234.2-6	3964.38	131.629	30.1178	0.613329	0.0544817	0.00245821	0.0738623	0.00402698	1.82087	0.122864	0.178795	0.00710817	0.58919	1037.71	110.09
	1802J1-2	2639.62	949.381	2.78036	0.0171186	0.0484668	0.00418294	0.0670751	0.00112143	1.38038	0.0935228	0.149257	0.00978668	0.967789	880.6	39.8986	896.798	54.7789	1.80625	core					2234.2-7	3576.93	168.75	21.1966	0.339346	0.0494044	0.00228113	0.0718164	0.00220415	1.74799	0.0769868	0.176528	0.00557622	0.717214	980.742	62.513
	S1801A.1-1	10930.5	1079.08	10.1295	-0.0220449	0.0483752	0.00370862	0.0677231	0.00122071	1.33983	0.0896276	0.143487	0.00914988	0.95326	863.155	38.8992	864.349	51.4796	0.138138	core					2234.2-9	5395.6	189.809	28.4265	0.401579	0.0449079	0.00216412	0.0696423	0.00254223	1.62948	0.0752285	0.169698	0.00479632	0.612209	917.827	75.0778
	S1801B.1-1	11928.6	1038.84	11.4826	-0.0013407	0.048527	0.00398516	0.0677673	0.00124118	1.36736	0.0926031	0.146339	0.00944743	0.953256	875.03	39.7235	880.409	53.0183	0.610894	core					Note:	Pb* denotes radiogenic Pb;
	S1801B.2-1	12345.8	1178.28	10.4778	-0.0216663	0.0455934	0.00391959	0.0676308	0.00128096	1.31638	0.0908199	0.141167	0.00927647	0.952463	852.926	39.816	851.259	52.2963	-0.195726	core						f206 is the common 206Pb proportion in total 206Pb, determined using the measured 204Pb/206Pb and a common Pb composition from the Stacey-Kramers (1975) at approximate age of the sample.
	S1801B.3-1	8330.52	509.404	16.3535	0.258877	0.0465536	0.00398907	0.0653443	0.00248225	1.30129	0.103265	0.144433	0.00998886	0.871506	846.292	45.5707	869.68	56.1433	2.68927	core						Two in-house monazite references have reported ages of 1796 ± 2 Ma and 1024 ± 3 Ma, respectively (Flecher et al., 2010; Chemical Geology 270 (2010) 31-44).
	S1801C.1-1	17177.7	1667.71	10.3002	-0.0349738	0.0487841	0.0040572	0.0677018	0.00104674	1.37247	0.0923197	0.147029	0.00952852	0.963457	877.223	39.5164	884.287	53.4403	0.798841	core
	S1801D.1-1	7781.62	1045.95	7.43977	0.00901605	0.0479377	0.00372941	0.0674079	0.00113085	1.35405	0.0933362	0.145688	0.00964855	0.960781	869.308	40.2643	876.746	54.1753	0.848353	core
	S1801D.1-2	5842.19	315.982	18.489	0.0853828	0.045941	0.00388817	0.0669251	0.00402034	1.31751	0.118978	0.142779	0.00961632	0.745818	853.423	52.1398	860.358	54.1318	0.806015	core
	S1801F.2-1	11452.1	868.865	13.1806	0.0226411	0.048629	0.00437128	0.0668471	0.00136395	1.35729	0.0955435	0.147261	0.00983204	0.948476	870.703	41.1602	885.593	55.1278	1.68134	core
	S1801F.2-4	5544.4	536.029	10.3435	0.0351907	0.0466535	0.00427717	0.0666934	0.00191264	1.35449	0.0881602	0.147297	0.00850721	0.887358	869.499	38.0238	885.792	47.7118	1.83934	core
	S1801G.1-1	20071.2	412.028	48.7132	-0.0563513	0.0488366	0.00418796	0.0662343	0.00195267	1.35732	0.0928613	0.148627	0.00909074	0.894024	870.717	40.0039	893.263	50.9191	2.52403	core
	S1801G.1-2	4863.44	1240.49	3.92057	0.0133978	0.0465258	0.00394702	0.0672391	0.00113732	1.35482	0.0870118	0.146137	0.00895445	0.954077	869.641	37.5231	879.272	50.2659	1.09532	core
	S1801I.1-1	17311	986.727	17.5438	0.0951302	0.0477487	0.00393001	0.0663796	0.00131065	1.32499	0.0926996	0.14477	0.00962681	0.950474	856.696	40.4896	871.578	54.0968	1.70746	core
	S1801I.1-2	2059.41	404.992	5.08507	0.133102	0.0418425	0.0034145	0.0658692	0.00237972	1.26438	0.090577	0.139217	0.00853877	0.856172	829.871	40.6216	840.234	48.2275	1.23326	core
	S1801J.1-1	2210.07	801.866	2.75616	0.00910337	0.0474723	0.00376354	0.0668653	0.00133068	1.35533	0.0903432	0.147009	0.00925737	0.944701	869.861	38.9517	884.176	51.9235	1.61904	core
	S1801J.2-1	4600.04	1327.36	3.46554	0.0270796	0.0477669	0.00398767	0.0670814	0.00109138	1.32483	0.087777	0.143238	0.00910562	0.959472	856.626	38.3416	862.946	51.2422	0.732324	core
	S1801A.1-2	8081.45	684.911	11.7993	0.0173657	0.0475291	0.00391412	0.0664874	0.00243776	1.29351	0.0989901	0.1411	0.00940818	0.871274	842.852	43.8318	850.882	53.0404	0.943771	rim
	S1801B.1-2	12073.1	858.319	14.0659	-0.0583278	0.0433285	0.0036746	0.0658133	0.00327754	1.2332	0.109815	0.1359	0.00998319	0.82494	815.797	49.9403	821.437	56.5321	0.686597	rim
	S1801D.1-3	234.741	558.01	0.420675	-0.107901	0.0418926	0.0040375	0.0683368	0.00226814	1.28541	0.0852543	0.136423	0.00775456	0.857032	839.262	37.8819	824.403	43.9133	-1.8024	rim
	S1801F.1-1	8354.97	291.203	28.6913	0.37371	0.0470701	0.00396128	0.0651335	0.00367474	1.27768	0.11919	0.142271	0.0105433	0.794404	835.819	53.1467	857.49	59.3642	2.52725	rim
	S1801F.2-2	4767.19	445.84	10.6926	0.211394	0.0434115	0.00394445	0.0661683	0.00265503	1.23171	0.0914788	0.135008	0.0083581	0.833563	815.119	41.6267	816.371	47.3837	0.153277	rim
	S1801F.2-3	15486.9	1100.85	14.0682	0.00708367	0.0381981	0.00320633	0.0663489	0.00153019	1.18145	0.0732373	0.129146	0.00733928	0.916763	791.988	34.0924	782.99	41.8328	-1.1492	rim
	S1801I.1-3	7026.7	680.828	10.3208	0.041921	0.0430585	0.00352499	0.0660733	0.00164867	1.28682	0.0904746	0.14125	0.00919498	0.925873	839.884	40.1774	851.728	51.834	1.3905	rim
	S1801J.1-2	9710.25	271.866	35.7171	-0.151636	0.04789	0.00386273	0.069339	0.00333848	1.37193	0.11237	0.1435	0.00946884	0.805615	876.989	48.1125	864.424	53.2699	-1.45355	rim
	S1801J.2-2	851.701	780.569	1.09113	-0.0347145	0.0457122	0.0037994	0.0668219	0.00146114	1.27352	0.0906604	0.138225	0.00928235	0.943324	833.965	40.4954	834.617	52.4644	0.078113	rim
	1802G1-2	15394.4	571.212	26.9504	-0.11025	0.0438936	0.00706001	0.0689069	0.00201953	1.24927	0.135194	0.13149	0.013771	0.967774	823.074	61.0486	796.358	78.2196	-3.35484	rim
	1802E1-1	4747.94	975.828	4.86555	0.11438	0.043601	0.00446192	0.0675024	0.00181633	1.22548	0.186522	0.13167	0.0198654	0.991258	812.28	85.1511	797.385	112.667	-1.86792	rim
	Rejected
	1802H1-1	13410.2	1006.39	13.3251	0.121345	0.0438803	0.00630575	0.0668899	0.00732399	1.23569	0.314984	0.133983	0.0311296	0.911479	816.927	143.294	810.546	175.761	-0.787301	rim
	1802J1-1	3883.45	1478.25	2.62706	0.0457944	0.0473929	0.00675576	0.0586254	0.0166075	1.09048	0.390772	0.134906	0.0301154	0.622949	748.738	190.36	815.793	169.934	8.21955	rim
	Note:	Pb* denotes radiogenic Pb;
		f206 is the common 206Pb proportion in total 206Pb, determined using the measured 204Pb/206Pb and a common Pb composition from the Stacey-Kramers (1975) at approximate age of the sample.

## Sheet: Table S4
Table S4. LA-ICP-MS U-Pb data for allanite in metasomatic rocks in Dahongshan
	DHS13-43 Aln I																					DHS13-42 Aln II
					Data for plot							Dates				Disc.(%)	Corrected Dates		f206							Data for plot							Dates				Disc.(%)	Corrected Dates		f206
	Name	ppm Th	ppm U	Th/U	207Pb/206Pb	2σ	207Pb/235U	2s	206Pb/238U	2σ	rho	207Pb/235U	2σ	206Pb/238U	2σ		206Pb*/238U	2σ				Name	ppm Th	ppm U	Th/U	207Pb/206Pb	2σ	207Pb/235U	2s	206Pb/238U	2σ	rho	207Pb/235U	2σ	206Pb/238U	2σ		206Pb*/238U	2σ
	DHS13-43-01	21.7687	47.4875	2.18146	0.122234	0.0121526	2.77832	0.235082	0.169046	0.00798046	0.557935	1349.73	63.176	1006.85	44.0062	25.4032	935.146	49.7279	0.0776416			Core (941 ± 10 Ma)
	DHS13-43-02	16.9621	57.8713	3.41179	0.0797508	0.00612234	1.73179	0.121226	0.159303	0.00485964	0.435793	1020.42	45.0587	952.901	27.0225	6.61647	940.731	29.3181	0.0139299			DHS13-42-1	1623.45	82.6705	19.6376	0.243177	0.0211869	7.34151	0.688377	0.209134	0.0105065	0.870622	2048.67	94.1913	1220.05	55.7886	59.595	956.024	60.0092	0.235587
	DHS13-43-03	156.968	74.3242	0.473499	0.0889083	0.00833375	1.94875	0.174525	0.160165	0.00666494	0.464653	1098.02	60.0965	957.692	37.0335	12.7799	933.105	39.9607	0.027986			DHS13-42-2	4457.26	122.455	36.3991	0.344809	0.0316085	13.9652	1.41843	0.271329	0.015727	0.960875	2578.67	140.35	1537.89	81.0025	56.3276	1012.97	93.1234	0.372882
	DHS13-43-04	7.84	44.1786	5.63502	0.0690077	0.00660394	1.48103	0.142172	0.156491	0.00607792	0.40459	922.652	58.1853	937.245	33.879	1.5816	938.985	36.5968	-0.00202498			DHS13-42-4	927.161	49.2838	18.8127	0.133013	0.0134455	2.98585	0.281444	0.168471	0.00820874	0.3551	1368.87	64.2712	1002.17	45.2822	49.7559	922.953	47.3957	0.0863122
	DHS13-43-05	36.6857	48.795	1.33008	0.076542	0.00779966	1.68006	0.186693	0.158165	0.00643371	0.366058	1001.01	70.7314	946.572	35.8104	5.43797	938.544	38.695	0.00924879			DHS13-42-5	306.576	113.908	2.69143	0.0849997	0.00677056	1.88738	0.139348	0.158333	0.00683343	0.329542	1064.23	48.1223	946.906	37.9615	26.0403	929.469	39.8657	0.0204405
	DHS13-43-06	141.571	35.1628	0.248376	0.0865143	0.0103835	1.84146	0.190037	0.159882	0.00769661	0.46647	1060.38	67.9089	956.121	42.7764	9.83257	934.786	46.3654	0.0243282			DHS13-42-23	135.836	159.231	0.853078	0.0695721	0.00530825	1.54449	0.108026	0.157966	0.00665952	0.379294	941.268	42.7078	945.058	37.0399	-2.83896	946.737	39.3045	-0.00144705
	DHS13-43-07	18.4055	27.4672	1.49234	0.0792092	0.0105203	1.72396	0.222205	0.161882	0.00921275	0.441532	1017.5	82.8294	967.226	51.1147	4.94091	956.308	55.0279	0.0123276			DHS13-42-24	132.876	128.306	1.03561	0.0742363	0.00569475	1.60852	0.109696	0.156574	0.0065988	0.197049	967.686	43.7952	937.176	36.7382	10.0502	932.837	38.8104	0.0055793
	DHS13-43-08	27.2944	50.0098	1.83224	0.0828225	0.00819078	1.83479	0.176922	0.162806	0.00732405	0.466537	1058	63.3709	972.354	40.6034	8.09488	956.582	43.6033	0.0177143			DHS13-42-25	400.847	159.301	2.51628	0.0812804	0.00676654	1.72364	0.127609	0.151515	0.0067826	0.00890494	1010.67	47.9704	908.994	37.9911	23.6121	895.086	39.7504	0.0169174
	DHS13-43-09	224.834	42.9491	0.191026	0.1003	0.00917132	2.25194	0.201276	0.164933	0.00707678	0.480057	1197.39	62.8462	984.134	39.1609	17.8102	944.031	42.6811	0.0444576			DHS13-42-27	44.6556	178.587	0.25005	0.0835744	0.00650144	1.88186	0.13239	0.15992	0.00661142	0.0586987	1064.34	44.9405	955.992	36.6793	22.7789	940.317	38.6313	0.017995
	DHS13-43-10	21.903	26.2613	1.19898	0.139432	0.0157347	3.28348	0.35548	0.174865	0.00800515	0.422851	1477.15	84.2651	1038.86	43.9238	29.6712	940.683	53.931	0.103065			DHS13-42-28	580.177	198.065	2.92922	0.0686679	0.00515511	1.55134	0.102831	0.16215	0.00678178	0.132168	947.421	41.213	968.376	37.6024	-10.8419	972.219	40.0159	-0.00389984
	DHS13-43-11	46.8276	55.3233	1.18142	0.0779605	0.0058969	1.72302	0.126873	0.161764	0.00820907	0.68918	1017.15	47.3094	966.575	45.5506	4.9724	957.365	48.0563	0.0104069			DHS13-42-29-1	887.196	243.755	3.6397	0.0790726	0.00584725	1.75885	0.115854	0.160353	0.00668642	0.295421	1028.84	41.6684	958.426	37.1513	16.8551	948.523	39.104	0.0114597
	DHS13-43-12	132.668	77.5839	0.584797	0.0828224	0.00573041	1.79945	0.121603	0.158429	0.00477359	0.445868	1045.26	44.1064	948.039	26.564	9.30098	931.531	28.703	0.0189792			DHS13-42-31	23.8478	69.308	0.344085	0.107437	0.0111739	2.44875	0.236339	0.160856	0.00743954	0.0908341	1227.48	67.4823	960.776	41.3488	42.747	915.165	43.5642	0.051723
	Note:	Analyzed by LA-ICP-MS in University of New Brunswick.																				DHS13-42-33	3459.21	322.991	10.7099	0.208941	0.0154843	5.58201	0.383621	0.190046	0.00800059	0.696012	1899.62	58.3215	1120.98	43.2365	61.0911	922.982	45.517	0.190012
		206Pb*/238U denote rediogenic 206Pb/238U using 207Pb correction method.																				DHS13-42-34	1555.42	258.302	6.0217	0.118112	0.00919351	2.66349	0.193397	0.160985	0.00667038	0.515911	1302.83	52.4291	961.913	37.0132	48.8774	902.213	38.2694	0.0668529
		Disconcordance calculated as ABS(1 – 206Pb-238U age/207Pb-235U age)*100.																				DHS13-42-35	38.218	39.0338	0.979099	0.0790995	0.00798157	1.68617	0.151559	0.157447	0.00789862	0.0685889	978.797	58.1803	941.005	43.8694	22.281	931.801	46.4599	0.0122723
		f206 refer to the 206Pbcommon/206Pbtotal calculated by equation (207Pb/206Pbmeasured – 207Pb*/206Pb*)/(207Pb/206Pbcommon – 207Pb*/206Pb*) and corrected date.																				DHS13-42-36	171.926	181.882	0.945259	0.0714812	0.00542743	1.58312	0.105204	0.160647	0.00667163	0.0219987	959.33	41.5666	960.053	37.0473	-0.057544	959.888	39.3021	0.000540748
																						DHS13-42-37	79.4849	199.572	0.398276	0.0758025	0.00571442	1.68891	0.112074	0.16151	0.0067644	0.135303	1000.16	42.4104	966.325	38.6258	9.74957	959.351	39.6775	0.00647821
	References																					DHS13-42-38	14.9206	155.748	0.0957996	0.0734706	0.00576833	1.6273	0.112503	0.162372	0.00682593	0.0807688	977.607	45.1711	969.596	37.8652	3.60872	967.324	40.1592	0.00290875
					Data for plot							Dates				Disc.(%)	Corrected Dates		f206			DHS13-42-39	114.288	123.047	0.928814	0.0761042	0.00594401	1.68913	0.118418	0.160832	0.00682096	0.225295	997.355	44.8377	960.979	37.8389	10.7639	955.063	40.0371	0.00709334
	Name	ppm Th	ppm U	Th/U	207Pb/206Pb	2σ	207Pb/235U	2s	206Pb/238U	2σ	rho	207Pb/235U	2σ	206Pb/238U	2σ		206Pb*/238U	2σ				DHS13-42-40	108.131	103.388	1.04587	0.0691691	0.00580893	1.53997	0.115886	0.162966	0.00702915	0.192539	935.008	45.7412	972.645	38.911	-10.8342	976.317	41.5533	-0.00341148
	Hartfield (406 ± 7 Ma)
	Hartfield - 1	51.65	7080	0.0072952	0.205	0.014	2.35	0.15	0.0804	0.0029	0.14672	1217	45	498	17	59.0797	407.991	16.8582	0.187371			DHS13-42-41	71.1632	96.6432	0.73635	0.0804465	0.00632168	1.76335	0.124258	0.158662	0.00683315	0.113017	1026.29	46.5289	948.77	37.9792	20.2114	937.085	39.9761	0.013869
	Hartfield - 2	64.25	9060	0.00709161	0.174	0.011	1.909	0.097	0.0769	0.0029	0.087428	1078	35	477	17	55.7514	408.797	16.459	0.148649			DHS13-42-42	101.764	99.7937	1.01975	0.102562	0.00791377	2.3435	0.164206	0.165516	0.00716916	0.28917	1215.58	49.7131	986.663	39.6513	40.2357	947.287	41.2059	0.0436355
	Hartfield - 3	60.32	7990	0.00754944	0.194	0.011	2.2	0.11	0.0783	0.0031	0.14057	1173	34	487	18	58.4825	404.123	17.0219	0.173738
	Hartfield - 4	72.9	8679	0.00839959	0.169	0.01	1.85	0.11	0.0743	0.0025	0.14465	1058	39	462	15	56.3327	398.075	14.3358	0.142693			Rim (840 ± 9 Ma)
	Hartfield - 5	77.9	8170	0.00953488	0.161	0.009	1.74	0.088	0.0748	0.0022	0.19745	1021	33	465	13	54.4564	405.281	12.7962	0.132519			DHS13-42-7	1074.97	3695.11	0.290916	0.0678538	0.00482284	1.29374	0.080675	0.138218	0.0055692	0.524471	842.451	35.836	834.511	31.5412	0.94257
	Hartfield - 6	56.44	7220	0.00781717	0.185	0.012	2.13	0.12	0.0797	0.0031	0.13969	1144	38	494	19	56.8182	416.691	17.5096	0.162182			DHS13-42-12	2493.84	3152.16	0.791155	0.0697437	0.00496896	1.32746	0.0831265	0.137938	0.00556664	0.367782	857.094	36.3853	832.918	31.5257	2.82072
																						DHS13-42-14	2559.76	3070.48	0.833668	0.0694771	0.0049509	1.29906	0.0811241	0.13603	0.00552564	0.474441	844.754	35.8615	822.067	31.3667	2.68553
	SISS (32.8 ± 2.3 Ma)																					DHS13-42-16	5087.49	3731.35	1.36344	0.0677784	0.00482209	1.2581	0.0787693	0.135197	0.00547262	0.524339	827.299	34.268	817.362	31.0631	1.2011
	SISS3 - 1	68.5	7920	0.00864899	0.815	0.027	15.32	0.47	0.1274	0.0042	0.32266	2834	26	773	23	72.7241	22.11	28.0041	0.973032			DHS13-42-17	8689.31	4725.2	1.83893	0.0666243	0.00474239	1.27669	0.0800348	0.140157	0.00563711	0.406151	835.649	34.8413	845.5	31.8786	-1.17888
	SISS3 - 2	132.1	8640	0.0152894	0.762	0.026	5.57	0.15	0.0497	0.0015	0.005917	1908	23	312.5	9.5	83.6216	30.0747	10.5466	0.905911			DHS13-42-19	4738.73	3066.4	1.54537	0.0691358	0.00492369	1.30744	0.0819452	0.13721	0.00559577	0.527899	848.351	36.2708	828.745	31.7185	2.31107
	SISS3 - 3	71.4	15520	0.00460052	0.725	0.042	3.91	0.17	0.0373	0.002	0.14676	1617	32	236	12	85.4051	33.8045	12.8616	0.859043			DHS13-42-44	4295.09	2585.35	1.66131	0.0692858	0.00494298	1.30811	0.0817323	0.138343	0.00558511	0.406961	848.657	36.25	835.2	31.6272	1.58566
	SISS3 - 4	223.6	14660	0.0152524	0.721	0.025	2.848	0.083	0.02714	0.00092	0.537	1364	22	172.6	5.8	87.346	25.4918	5.587	0.854007			DHS13-42-45	3426.9	3114.04	1.10047	0.070057	0.00498071	1.32344	0.0826189	0.138422	0.00561016	0.597847	855.457	36.1189	835.635	31.7665	2.3172
	SISS3 - 5	127.3	13340	0.00954273	0.751	0.023	5.98	0.15	0.0554	0.0015	0.29038	1972	22	347.5	9.2	82.3783	38.47	10.4042	0.891958			DHS13-42-47	5225.52	3720.97	1.40434	0.0661895	0.0047087	1.28992	0.0805699	0.141788	0.00572512	0.542335	840.756	35.6961	854.691	32.3086	-1.65739
	SISS3 - 6	122.6	19900	0.0061608	0.649	0.032	2.267	0.091	0.02403	0.00092	0.26192	1197	29	153	5.8	87.218	36.6435	6.40342	0.762775			DHS13-42-48	2032.69	3427.78	0.593004	0.0685978	0.00487212	1.30835	0.0815549	0.140059	0.00565306	0.521668	849.554	36.9426	844.915	31.9927	0.546143
	SISS3 - 7	129.3	16390	0.00788896	0.671	0.033	2.359	0.09	0.02417	0.00098	0.24666	1223	27	153.9	6.2	87.4162	32.5349	6.61645	0.790661			DHS13-42-51	4224.71	2456.51	1.7198	0.0668698	0.00476795	1.2924	0.081193	0.14141	0.00574862	0.476383	841.663	36.1382	852.528	32.4493	-1.29087
	SISS3 - 8	72.5	9660	0.00750518	0.806	0.029	9.22	0.35	0.0798	0.0028	0.43063	2355	34	495	17	78.9809	19.7034	18.8514	0.96164			DHS13-42-52	3930.52	2412.93	1.62894	0.0661265	0.00471486	1.30182	0.08113	0.14357	0.00581744	0.417589	846.143	35.7799	864.732	32.7981	-2.19682
	SISS3 - 9	124.5	16020	0.00777154	0.749	0.026	5.57	0.17	0.051	0.0015	0.48186	1911	26	320.6	9.1	83.2234	36.2492	10.8279	0.889431			DHS13-42-56	4249.32	2230.96	1.9047	0.0684524	0.00488371	1.32885	0.0834674	0.141084	0.00572112	0.4183	857.606	36.3816	850.686	32.2893	0.806895
	SISS3 - 10	231.1	14460	0.015982	0.628	0.029	2.086	0.072	0.02263	0.0008	0.052761	1143	24	144.2	5.1	87.3841	38.3742	5.50099	0.736166			rim analyses with high disconcordance
	SISS3 - 11	148.7	15300	0.00971895	0.741	0.03	3.48	0.13	0.0322	0.0013	0.634	1518	29	204.1	8.1	86.5547	24.999	7.92364	0.879332			DHS13-42-6	1063.95	3894.42	0.273199	0.0711158	0.00507044	1.27761	0.0798991	0.1313	0.00533854	0.568985	836.185	34.5677	795.191	30.4237	4.90245
	SISS3 - 12	63.3	14220	0.00445148	0.783	0.03	6.52	0.38	0.0587	0.0037	0.36751	2040	43	367	22	82.0098	25.4875	14.4162	0.932511			DHS13-42-8	963.65	4153.32	0.232019	0.0706398	0.00502103	1.35083	0.0842313	0.137741	0.00556907	0.555642	867.389	36.3042	831.786	31.5497	4.1047
	SISS3 - 13	130.9	19780	0.0066178	0.681	0.034	2.86	0.12	0.0297	0.0012	0.23591	1374	31	188.3	7.5	86.2955	37.5502	8.34326	0.8033			DHS13-42-9	1070.87	4825.82	0.221905	0.0775636	0.00552237	1.3262	0.0825108	0.123737	0.00500039	0.439029	856.844	35.9832	751.971	28.6741	12.2394
	SISS3 - 14	214	9240	0.0231602	0.703	0.022	3.219	0.089	0.03144	0.00099	0.40247	1458	22	199.5	6.2	86.3169	34.1253	5.72349	0.831179			DHS13-42-10	147.765	1175.08	0.125748	0.0716966	0.00516667	1.28879	0.081621	0.130163	0.0052936	0.313246	840.675	34.7618	788.688	30.2081	6.18395
	SISS3 - 15	89.1	16100	0.00553416	0.683	0.044	2.72	0.11	0.028	0.0014	0.034799	1342	29	178.1	9	86.7288	34.9498	10.1636	0.805846			DHS13-42-11	4503.12	2908.07	1.54849	0.0741324	0.0053354	1.39078	0.0885502	0.136551	0.00552097	0.403697	883.593	37.5426	825.051	31.3193	6.6255
	Note:	Analyzed by LA-ICP-MS in University of New Brunswick.																				DHS13-42-13	2173.28	1969.62	1.1034	0.0767069	0.0054919	1.33445	0.0838212	0.126334	0.00515603	0.409793	860.125	36.3695	766.823	29.4679	10.8474
		Two in-house allanite references have reported ages of 415 ± 2 Ma and 31.53 ± 0.36 Ma, respectively (McFarlane, Chemical Geology 438 (2016) 91-102).																				DHS13-42-18	4358.51	4088.03	1.06616	0.0701693	0.00499175	1.2967	0.0809332	0.134525	0.00543213	0.273769	844.364	35.0035	813.543	30.8566	3.65021
		206Pb*/238U denote rediogenic 206Pb/238U using 207Pb correction method.																				DHS13-42-20	4003.57	3345.81	1.19659	0.0700023	0.00500191	1.30393	0.0816087	0.135176	0.00549562	0.48245	846.787	36.1662	817.215	31.1752	3.49232
		Disconcordance calculated as ABS(1 – 206Pb-238U age/207Pb-235U age)*100.																				DHS13-42-21	6960.07	4256.94	1.63499	0.0767182	0.0054576	1.32763	0.0830817	0.125682	0.0050949	0.55408	857.232	36.3328	763.108	29.1616	10.9801
		f206 refer to the 206Pbcommon/206Pbtotal calculated by equation (207Pb/206Pbmeasured – 207Pb*/206Pb*)/(207Pb/206Pbcommon – 207Pb*/206Pb*) and corrected date.																				DHS13-42-22	7938.48	3116.68	2.5471	0.0754685	0.00538744	1.34753	0.0844326	0.129124	0.0052286	0.45119	865.821	36.8726	782.789	29.85	9.59002
																						DHS13-42-43	7871.04	4108.76	1.91567	0.0743355	0.00528328	1.3406	0.0836716	0.131952	0.00533387	0.563405	862.94	36.4177	798.918	30.3773	7.41909
																						DHS13-42-46	2726.07	3929.91	0.693672	0.0779475	0.00556254	1.34501	0.0838375	0.126375	0.00511841	0.476555	864.93	36.5656	767.074	29.2781	11.3138
																						DHS13-42-49	3863.61	2701.61	1.43011	0.0715717	0.00509848	1.36651	0.0854752	0.139136	0.0056153	0.371787	874.015	37.0789	839.702	31.7541	3.92585
																						DHS13-42-50	5325.38	3614.35	1.4734	0.0713162	0.00510061	1.33221	0.0832079	0.135814	0.0054932	0.257988	859.329	36.1777	820.868	31.1769	4.47571
																						DHS13-42-54	2237.63	2556.02	0.875436	0.0717974	0.00511104	1.39291	0.0869757	0.140561	0.00568741	0.492595	885.42	36.9662	847.751	32.1422	4.25429
																						DHS13-42-55	3996.66	3667.11	1.08986	0.0742867	0.00530625	1.36317	0.0852184	0.133582	0.00541675	0.319104	872.579	36.6826	808.151	30.8252	7.38359
																						Note:	Analyzed by fs-LA-ICP-MS in Guangzhou Institution of Geochemistry, CAS.
																							206Pb*/238U denote rediogenic 206Pb/238U using 207Pb correction method.
																							Disconcordance calculated as ABS(1 – 206Pb-238U age/207Pb-235U age)*100.
																							f206 refer to the 206Pbcommon/206Pbtotal calculated by equation (207Pb/206Pbmeasured – 207Pb*/206Pb*)/(207Pb/206Pbcommon – 207Pb*/206Pb*) and corrected date.
																						DHS10-74 Aln III
																										Data for plot							Dates				Disc.(%)	Corrected Dates		f206
																						Name	ppm Th	ppm U	Th/U	207Pb/206Pb	2σ	207Pb/235U	2s	206Pb/238U	2σ	rho	207Pb/235U	2σ	206Pb/238U	2σ		206Pb*/238U	2σ
																						Core
																						DHS10-74-8	427.348	39.8952	10.7118	0.0805626	0.0148154	1.79552	0.40263	0.16492	0.014364	0.0165501	1018.63	149.334	981.264	78.9456	22.8511
																						DHS10-74-9	649.646	38.4062	16.9151	0.0825559	0.0159751	1.79566	0.428785	0.152826	0.0138022	0.177064	1018.91	152.426	914.674	77.1151	27.3213
																						DHS10-74-10	386.072	37.0189	10.429	0.0736127	0.0126352	1.6759	0.367632	0.180603	0.0151981	0.282166	971.552	137.55	1067.32	82.9574	4.56691
																						DHS10-74-17	31.9403	30.6362	1.04257	0.0821158	0.0140053	1.7932	0.387641	0.164983	0.0133597	0.0460348	1009.96	143.366	982.073	73.9912	24.1509
																						DHS10-74-18	269.577	26.6772	10.1051	0.0810898	0.0137624	2.08274	0.451637	0.202593	0.0165019	0.297395	1121.29	148.618	1186.08	88.2603	2.55409
																						DHS10-74-19	208.95	7.878	26.5232	0.0755251	0.0147564	2.03153	0.476735	0.202139	0.0188572	0.252244	1007.22	180.202	1175.72	100.859	29.3465
																						DHS10-74-20	221.73	8.60611	25.7643	0.0939848	0.0182198	1.93488	0.446682	0.173191	0.0161442	0.210533	995.413	179.557	1018.65	87.6296	43.7634
																						DHS10-74-21	345.435	12.3614	27.9447	0.184573	0.0331733	5.49179	1.21383	0.227996	0.0218297	0.272743	1847.91	201.503	1313.68	113.983	48.6043
																						Rim1 (1139 ± 17 Ma)
																						DHS10-74-2	419.154	69.1618	6.06048	0.0834505	0.0135727	2.10985	0.446592	0.190806	0.0149254	0.278175	1141.81	148.323	1124.33	80.5621	1.53064
																						DHS10-74-3	1.58611	23.004	0.0689493	0.0840835	0.0141319	2.19104	0.473295	0.200211	0.016324	0.0912567	1151.64	149.375	1173.33	87.6753	1.88308
																						DHS10-74-4	113.525	42.7554	2.65521	0.0772796	0.012686	2.08016	0.440621	0.201554	0.0159271	0.066446	1127.72	146.732	1181.63	85.0468	4.77969
																						DHS10-74-5	858.477	120.241	7.13963	0.086604	0.0143753	2.43304	0.516356	0.202104	0.0163687	0.0448784	1244.46	157.271	1185.43	87.5307	4.74349
																						DHS10-74-6	92.8867	34.4035	2.69992	0.0776884	0.0135958	1.95106	0.431836	0.183361	0.0153738	0.31296	1085.2	161.59	1083.15	83.3414	0.188424
																						DHS10-74-7	5.9478	32.4875	0.18308	0.0754763	0.0128066	2.14419	0.464279	0.204591	0.0166396	0.115441	1134.08	155.511	1197.33	88.8915	5.57657
																						DHS10-74-11	2.1689	24.0663	0.0901221	0.0852947	0.0143798	2.16619	0.466402	0.196278	0.0157229	0.23992	1144.09	161.848	1155.09	86.0624	0.961231
																						DHS10-74-12	142.546	36.4434	3.91143	0.0738942	0.0124107	1.92166	0.411755	0.193802	0.0154429	0.0397598	1071.61	145.717	1140.02	83.173	6.3839
																						DHS10-74-14	515.049	64.1495	8.02889	0.0752327	0.0124211	1.95694	0.416706	0.190062	0.0149659	0.159979	1087.53	140.872	1120.33	80.7685	3.01613
																						DHS10-74-15	10.9496	49.9122	0.219378	0.0785247	0.0129221	2.06085	0.436914	0.196126	0.0153361	0.00875067	1116.13	145.272	1152.85	82.8199	3.28975
																						DHS10-74-16	107.583	56.296	1.91102	0.0978936	0.0162956	2.59751	0.557046	0.188997	0.0149963	0.207886	1279.67	154.595	1118.38	84.4228	12.6043
																						DHS10-74-23	39.8046	70.3943	0.565452	0.084993	0.0139372	2.07301	0.441994	0.182092	0.0144886	0.392676	1129.36	156.319	1076.46	78.6477	4.68429
																						DHS10-74-24	16.5063	34.5088	0.478322	0.0831799	0.0138856	2.13522	0.457064	0.196923	0.0155576	0.225823	1137.22	159.914	1156.67	83.5676	1.71015
																						DHS10-74-25	1537.29	69.4441	22.1371	0.0741017	0.0121261	1.87062	0.396172	0.18826	0.0147085	0.156366	1057.72	142.492	1110.61	79.638	5.00059
																						DHS10-74-26	388.565	73.0332	5.32039	0.0725598	0.0119114	1.78444	0.378412	0.179812	0.0142385	0.190459	1029.79	142.428	1064.56	77.5428	3.37649
																						DHS10-74-27	13.6467	56.6489	0.240899	0.0724808	0.0121038	1.75561	0.376081	0.176308	0.014136	0.0724188	1015.82	141.361	1045.17	77.3152	2.88971
																						DHS10-74-28	77.6561	50.0828	1.55055	0.077092	0.0127953	1.90805	0.407007	0.182206	0.0144141	0.097221	1062.3	144.352	1077.33	78.4983	1.41518
																						DHS10-74-43	1127.7	181.751	6.20462	0.0720463	0.0115922	1.98122	0.415738	0.20024	0.0154781	0.301698	1103.76	143.767	1175.97	83.0688	6.5426
																						DHS10-74-44	448.418	52.8482	8.48503	0.0740264	0.0120598	2.01018	0.42439	0.208277	0.0161867	0.103616	1105.24	145.178	1218.05	86.0526	10.2069
																						DHS10-74-45	0.778633	37.5124	0.0207567	0.068571	0.0115574	1.78257	0.3823	0.19798	0.0156399	0.0446124	1014.21	143.816	1162.33	84.0849	14.6046
																						DHS10-74-46	289.859	198.025	1.46374	0.0685048	0.0109437	1.89376	0.396419	0.198733	0.0153583	0.350692	1077.47	144.765	1167.88	82.479	8.39117
																						DHS10-74-48	33.906	40.0357	0.846894	0.0705095	0.0116817	1.89312	0.404172	0.204107	0.0161145	0.017069	1057.38	139.586	1195.08	85.8206	13.0229
																						DHS10-74-49	14.3865	49.8016	0.288876	0.0672056	0.0112077	1.70299	0.36506	0.189597	0.0151001	0.252442	993.246	140.117	1120.65	83.9654	12.8271
																						DHS10-74-54	16.122	25.9847	0.620443	0.081282	0.0137514	2.16496	0.468995	0.20079	0.0162365	0.233828	1134.6	152.519	1176.4	87.1158	3.68393
																						DHS10-74-55	5.5296	17.7968	0.310708	0.0802562	0.0140705	2.11182	0.462694	0.205898	0.0172407	0.0326424	1107.13	158.548	1201.27	91.2885	8.50335
																						DHS10-74-56	84.0326	32.192	2.61036	0.0753801	0.0128766	1.94401	0.419678	0.194107	0.0156644	0.0776119	1065.09	145.772	1144.69	86.849	7.47324
																						DHS10-74-57	13.7792	43.9658	0.313408	0.0734866	0.0121851	1.90406	0.4072	0.193965	0.0153849	0.173304	1067.62	136.202	1140.57	82.7089	6.83306
																						DHS10-74-58	45.409	42.5504	1.06718	0.0768692	0.012856	2.12047	0.456635	0.199164	0.0159189	0.266669	1133.45	155.198	1168.74	85.4557	3.11343
																						DHS10-74-61	7.81473	45.6344	0.171247	0.0740441	0.0124334	1.92365	0.414545	0.189621	0.015004	0.168087	1062.32	146.766	1117.71	81.1771	5.21399
																						DHS10-74-62	462.547	68.2814	6.77413	0.0806883	0.0132214	2.09896	0.446999	0.189934	0.0150126	0.262506	1134.03	148.772	1119.46	81.1605	1.28472
																						Rim2 (936 ± 26 Ma)
																						DHS10-74-29	45.7547	470.506	0.0972459	0.0681468	0.0111595	1.44397	0.304962	0.150191	0.0116287	0.0438443	903.604	115.224	901.784	65.1292	0.201372	907.281	98.6483	-0.0062374
																						DHS10-74-30	38.3429	130.185	0.294526	0.0737682	0.0120052	1.5928	0.337868	0.15809	0.0123529	0.316073	955.159	134.436	945.385	68.761	1.02331	927.824	106.584	0.0208013
																						DHS10-74-31	49.0946	241.485	0.203303	0.0683579	0.01096	1.4492	0.304113	0.153591	0.0118748	0.377165	906.307	122.928	920.561	66.3767	1.57279	928.887	100.882	-0.00912337
																						DHS10-74-32	27.598	572.799	0.0481809	0.0667487	0.0106269	1.40775	0.29428	0.151354	0.0116361	0.0716781	889.234	123.929	908.252	64.9945	2.13871	922.77	98.3634	-0.0168032
																						DHS10-74-33	25.8341	916.62	0.0281841	0.0903615	0.0145383	2.27397	0.481962	0.1793	0.0140705	0.844064	1193.03	157.822	1062.36	76.9561	10.9525	957.45	134.53	0.106963
																						DHS10-74-34	16.8413	1169.38	0.014402	0.0991239	0.0157138	2.59041	0.541908	0.18965	0.0146371	0.787395	1291.52	154.798	1118.77	79.5051	13.376	957.864	151.798	0.155308
																						DHS10-74-35	17.8816	916.663	0.0195073	0.0756913	0.0119966	1.57472	0.328071	0.151858	0.011581	0.387606	959.395	132.519	911.154	64.8367	5.02833	876.984	99.0947	0.0403543
																						DHS10-74-36	54.9001	1192.3	0.0460454	0.079608	0.012634	1.85455	0.388451	0.168244	0.0128641	0.752335	1059.67	137.368	1002.1	70.9158	5.43347	958.272	115.044	0.0474013
																						DHS10-74-37	63.1685	1067.01	0.0592015	0.0896337	0.0142706	2.11476	0.442097	0.165855	0.0127205	0.405122	1151.5	143.355	989.066	70.4259	14.1066	882.57	119.876	0.115354
																						DHS10-74-38	61.5753	491.534	0.125272	0.0729417	0.0116888	1.60086	0.334086	0.15808	0.0121309	0.0466772	968.106	131.097	945.812	67.5431	2.30277	932.543	104.66	0.0153895
																						DHS10-74-39	65.2038	665.894	0.0979191	0.0699224	0.0110892	1.45911	0.304174	0.152977	0.0116383	0.318865	911.341	126.15	917.439	65.0473	0.669151	916.034	98.8742	0.00186751
																						DHS10-74-40	38.0847	750.964	0.0507144	0.0667207	0.0105808	1.45196	0.302809	0.15833	0.012047	0.288601	908.599	124.752	947.312	66.936	4.26077	970.573	104.268	-0.0262452
																						DHS10-74-41	420.967	1066.7	0.394646	0.0929022	0.0147341	2.23639	0.467443	0.175062	0.0134584	0.771498	1186.79	146.205	1039.43	73.6505	12.4167	915.969	130.938	0.127851
																						DHS10-74-42	178.09	1215.81	0.146478	0.0807309	0.0128518	1.83863	0.38523	0.1628	0.0124719	0.507485	1055.58	134.908	972.052	69.0342	7.91286	917.083	110.952	0.060936
																						DHS10-74-50	39.7805	516.849	0.0769673	0.0608466	0.00966833	1.35698	0.283374	0.160032	0.0122021	0.382678	867.646	122.144	956.766	67.7685	10.2715	1017.78	109.091	-0.0687202
																						DHS10-74-52	159.305	436.723	0.364774	0.0589717	0.00940906	1.25474	0.26208	0.152065	0.0116871	0.265044	822.977	118.968	912.217	65.2216	10.8436	971.227	102.034	-0.0693018
																						DHS10-74-53	95.7722	494.834	0.193544	0.0707696	0.0113964	1.61496	0.339785	0.161493	0.0126962	0.0805117	973.03	129.553	964.663	70.2557	0.859968	968.049	109.565	-0.00332783
																						Note:	Analyzed by fs-LA-ICP-MS in Guangzhou Institution of Geochemistry, CAS.
																							206Pb*/238U denote rediogenic 206Pb/238U using 207Pb correction method.
																							Disconcordance calculated as ABS(1 – 206Pb-238U age/207Pb-235U age)*100.
																							f206 refer to the 206Pbcommon/206Pbtotal calculated by equation (207Pb/206Pbmeasured – 207Pb*/206Pb*)/(207Pb/206Pbcommon – 207Pb*/206Pb*) and corrected date.
																						References
																										Data for plot							Dates				Disc.(%)
																						Name	ppm Th	ppm U	Th/U	207Pb/206Pb	2σ	207Pb/235U	2s	206Pb/238U	2σ	rho	207Pb/235U	2σ	206Pb/238U	2σ
																						L166 (1704 ± 44 Ma)
																						L166	9.89318	109.405	0.0904273	0.10571	0.00771449	4.24738	0.272889	0.293756	0.0120232	0.243012	1710.11	135.665	1659.64	59.9627	2.95116
																						L166	17.3845	93.7279	0.185478	0.105573	0.0079345	4.26793	0.285979	0.297192	0.0129086	0.383361	1704.27	145.206	1675.72	63.9588	1.6753
																						L166	8.09232	55.4731	0.145878	0.106478	0.00834489	4.24574	0.28965	0.290335	0.0127762	0.109974	1713.5	140.706	1641.32	63.7286	4.21266
																						L166	9.44419	61.8834	0.152613	0.10398	0.0081428	4.20428	0.28745	0.294858	0.0126923	0.0492328	1660.98	142.099	1664.24	63.0948	0.196685
																						L166	306.772	65.2795	4.69936	0.108528	0.00885428	4.34379	0.315067	0.29381	0.0130417	0.0864946	1762.53	148.061	1664.31	68.5143	5.57264
																						L166	1.67713	67.5854	0.0248149	0.105851	0.00799957	4.25417	0.281066	0.294691	0.0125988	0.176631	1698.58	142.641	1663.21	62.5126	2.08242
																						L166	0.586728	83.076	0.00706254	0.104751	0.00771797	4.214	0.273558	0.293128	0.0122997	0.28722	1688.91	139.15	1655.97	61.3497	1.95045
																						L166	76.6026	100.953	0.758795	0.107548	0.00820429	4.32993	0.294539	0.294757	0.0124361	0.149201	1739.66	143.32	1664.36	62.0101	4.32833
																						L166	1.79789	64.6499	0.0278097	0.105306	0.00790393	4.23181	0.282088	0.293804	0.0123304	0.178222	1694.66	147.492	1659.15	61.3206	2.09546
																						L166	5.6249	83.9077	0.0670368	0.104974	0.0170026	4.21634	0.88804	0.293501	0.0228251	0.204419	1678.72	300.345	1657.76	114.083	1.24845
																						L166	190.595	67.671	2.8165	0.107906	0.0175134	4.36614	0.922351	0.294971	0.0230154	0.408593	1720.56	290.975	1664.32	114.225	3.26856
																						L166	182.645	68.832	2.65349	0.102489	0.0168195	4.12488	0.872292	0.293799	0.0228486	0.121321	1639.54	303.9	1658.3	113.942	1.14464
																						L166	215.953	49.1223	4.39623	0.109347	0.0179015	4.4228	0.936873	0.294086	0.023346	0.26099	1729.79	315.629	1658.95	116.267	4.09551
																						L166	186.626	85.6334	2.17936	0.105462	0.0169302	4.21078	0.882802	0.292304	0.0226264	0.267085	1692.7	289.608	1651.41	112.669	2.43918
																						L166	13.3615	78.6054	0.169983	0.104342	0.016798	4.25682	0.894414	0.298369	0.0230957	0.158819	1682.57	299.319	1681.52	114.799	0.0620292
																						L166	94.5647	48.4194	1.95303	0.104338	0.0173077	4.07533	0.864311	0.28418	0.0226575	0.00166721	1640.89	300.058	1609.82	113.789	1.89378
																						L166	296.846	88.1275	3.36837	0.108633	0.0174461	4.4373	0.929839	0.297784	0.0230952	0.32388	1746.4	285.744	1678.49	114.527	3.88887
																						L166	11.2813	66.8099	0.168856	0.104356	0.0167086	4.1522	0.869222	0.292051	0.0225276	0.271199	1676.05	295.954	1649.84	112.323	1.56379
																						L166	44.1391	79.8213	0.552974	0.105989	0.0170042	4.27308	0.893097	0.295029	0.0229013	0.211647	1706.12	294.959	1664.9	113.986	2.41628
																						Note:	Analyzed by fs-LA-ICP-MS in Guangzhou Institution of Geochemistry, CAS.
																							The in-house allanite reference has a reported age of 1719 ± 22 Ma (Su et al., 2021, Economic Geology 116 (7) 1687-1710).
																							Disconcordance calculated as ABS(1 – 207Pb-206Pb age/ 206Pb-238U age)*100.

## Sheet: Table S5
Table S5. LA-ICP-MS U-Pb data for monazite in metasomatic rocks in Dahongshan
	DHS13-60 Mon I																					Reference
					Data for plot									Dates				Disc.(%)								Data for plot									Dates				Disc.(%)
	Name	Th	U	Th/U	208Pb/232Th	2σ	207Pb/206Pb	2σ	207Pb/235U	2s	206Pb/238U	2σ	rho	207Pb/235U	2σ	206Pb/238U	2σ					Name	Th	U	Th/U	208Pb/232Th	2σ	207Pb/206Pb	2σ	207Pb/235U	2s	206Pb/238U	2σ	rho	207Pb/235U	2σ	206Pb/238U	2σ
	Relic cores																					E0013 (588 ± 3 Ma)
	DHS13-60-2-4	3603.81	272.392	13.2302	0.0456367	0.000743537	0.0735461	0.00234922	1.75541	0.0561447	0.174135	0.00312283	0.560703	1029.16	20.7015	1034.85	17.1546	0.553388				E0013	90929.2	2622.98	34.6664	0.0307468	0.000349394	0.0629173	0.00139658	0.833791	0.0198185	0.0965715	0.00135494	0.590277	615.713	10.9816	594.285	7.97173	3.48022
	DHS13-60-1-3	3400.61	238.358	14.2668	0.0461492	0.000602805	0.0693299	0.00188852	1.65673	0.0461313	0.174271	0.00277158	0.571161	992.127	17.644	1035.6	15.2255	4.3817				E0013	78105.1	6663.86	11.7207	0.0298819	0.000332824	0.0603627	0.00104725	0.793863	0.0140687	0.0957614	0.00113567	0.669196	593.361	7.97353	589.521	6.68877	0.647091
	DHS13-60-2-14	1952.11	171.138	11.4067	0.052466	0.00116068	0.0749087	0.00212668	2.00459	0.0765799	0.194003	0.00421511	0.568737	1117.06	25.8909	1143.02	22.7657	2.32383				E0013	75575.8	5175.18	14.6035	0.0291427	0.000281462	0.0601757	0.000892006	0.787992	0.0123129	0.0953393	0.00092712	0.622338	590.032	7.00386	587.038	5.46559	0.507548
	DHS13-60-3-2	1829.42	140.886	12.9851	0.0485871	0.000442963	0.0804945	0.00262041	2.28209	0.0725589	0.206873	0.00252795	0.384331	1206.76	22.4626	1212.14	13.5187	0.445474				E0013	76062.8	1444.36	52.662	0.0301932	0.000605647	0.0624936	0.00271955	0.815992	0.0335127	0.0952113	0.00198474	0.507566	605.81	18.7426	586.284	11.6865	3.22308
																						E0013	80074.9	7387.99	10.8385	0.0298494	0.000214806	0.0602015	0.000763604	0.787279	0.00984173	0.0951821	0.000757587	0.6367	589.627	5.60561	586.112	4.4705	0.596191
	Rim1																					E0013	81585.6	2702.32	30.1909	0.0297866	0.000349677	0.0625642	0.00147417	0.821418	0.0209524	0.0955467	0.00122433	0.502358	608.839	11.6876	588.258	7.21121	3.38046
	DHS13-60-2-6	5514.05	593.623	9.28881	0.0397322	0.000341903	0.0682947	0.00117557	1.43045	0.024681	0.15254	0.00154346	0.58644	901.739	10.3293	915.184	8.64705	1.491				E0013	62713	1661.67	37.7408	0.0295311	0.000232892	0.072876	0.00147796	0.949547	0.0193611	0.0949079	0.000833586	0.430759	677.867	10.0944	584.498	4.91799	13.7739
	DHS13-60-2-9	5219.21	443.284	11.774	0.0403961	0.000495999	0.0664979	0.00212808	1.39765	0.0420179	0.153289	0.0024333	0.528016	887.94	17.8045	919.374	13.6102	3.54018				E0013	68477.5	6741.83	10.1571	0.0298928	0.000307101	0.0607724	0.00137627	0.788338	0.0110455	0.0944244	0.000877214	0.663051	590.229	6.28426	581.651	5.17653	1.45328
	DHS13-60-1-2	6929.32	570.779	12.1401	0.0407968	0.000361559	0.0689033	0.00143766	1.45325	0.0329646	0.153666	0.00191591	0.549655	911.219	13.6579	921.482	10.7172	1.12629				E0013	69383.4	3269.1	21.224	0.0301925	0.000285743	0.0605849	0.000795605	0.805539	0.0112666	0.0968063	0.000928385	0.685674	599.948	6.34914	595.665	5.466	0.713897
	DHS13-60-1-6	5518.99	436.182	12.653	0.0416994	0.000387174	0.068925	0.00154887	1.45607	0.0315509	0.154035	0.00175895	0.526993	912.385	13.0584	923.543	9.8381	1.22293				E0013	63603.5	2157.77	29.4765	0.0299236	0.000256324	0.0607622	0.000918421	0.804014	0.0117715	0.0963848	0.000909423	0.644449	599.091	6.63807	593.188	5.35672	0.985337
	DHS13-60-2-13	6129.65	531.375	11.5355	0.0404195	0.000346228	0.0671716	0.00129389	1.4213	0.0278936	0.154131	0.00155568	0.514296	897.908	11.7132	924.077	8.70359	2.91445				Note:	Analyzed by LA-ICP-MS in Institute of Geology and Geophysics, Chinese Academy of Sciences (IGG-CAS)
	DHS13-60-1-5	5694.64	535.944	10.6254	0.0415125	0.000618399	0.0686079	0.00158264	1.4515	0.0391373	0.154218	0.00291509	0.701039	910.495	16.222	924.566	16.2887	1.54535					The international monazite reference has a reported age of 587 ± 5 Ma (Janasi et al., 2003, Série Científica 3: 13-24).
	DHS13-60-2-1	5057.57	433.142	11.6765	0.0410859	0.00045881	0.0708317	0.00173762	1.50173	0.0354508	0.154604	0.00192008	0.526095	931.09	14.4024	926.721	10.7319	0.469152					Disconcordance calculated as ABS(1 – 206Pb-238U age/207Pb-235U age)*100.
	DHS13-60-2-2	4894.86	418.095	11.7075	0.040654	0.00065323	0.0674158	0.00186891	1.43259	0.0417985	0.154835	0.00285143	0.631182	902.632	17.4578	928.01	15.9249	2.81154
	DHS13-60-1-7	6147.21	498.417	12.3335	0.0402864	0.000389119	0.0674614	0.0013082	1.43819	0.0299577	0.155199	0.00170369	0.527001	904.967	12.491	930.039	9.52046	2.77047
	DHS13-60-2-3	4872.18	367.542	13.2561	0.0419991	0.000915934	0.0693438	0.00264794	1.47694	0.0545222	0.155458	0.00346943	0.604552	920.975	22.3593	931.487	19.3628	1.14137
	DHS13-60-2-12	5410.08	436.099	12.4056	0.0417165	0.000396399	0.0677258	0.00189287	1.44488	0.0374121	0.155599	0.00191407	0.475085	907.747	15.5499	932.271	10.6894	2.70165
	DHS13-60-3-5	5470.42	549.738	9.95096	0.0412925	0.000520425	0.0669574	0.00191534	1.43627	0.0386215	0.156319	0.00185993	0.44248	904.166	16.1083	936.287	10.3813	3.55249
	DHS13-60-2-7	4463.25	435.691	10.2441	0.0418283	0.000444999	0.06718	0.00148051	1.45235	0.0308645	0.157585	0.00168289	0.502518	910.844	12.7943	943.345	9.3856	3.56815
	Rim2
	DHS13-60-2-8	6906.75	789.092	8.75277	0.0387021	0.000426301	0.0664568	0.00158762	1.24692	0.0286071	0.136714	0.00184577	0.58848	822.015	12.9396	826.052	10.477	0.491104
	DHS13-60-1-1	7853.82	1021.78	7.68643	0.0385434	0.000532171	0.0680626	0.00163366	1.28002	0.031657	0.137012	0.00197328	0.582345	836.864	14.1096	827.741	11.1967	1.09013
	DHS13-60-2-15	6944.97	804.104	8.63691	0.0385674	0.000643982	0.067683	0.00185337	1.27771	0.0366991	0.137398	0.00198142	0.50208	835.833	16.37	829.931	11.239	0.706123
	DHS13-60-3-1	8813.63	1020.04	8.6405	0.0394446	0.000339762	0.067132	0.00100634	1.28426	0.0199916	0.139294	0.00123911	0.571455	838.748	8.90481	840.67	7.02588	0.229126
	mixed analyses
	DHS13-60-1-4	6482.12	536.197	12.0891	0.0392421	0.000422415	0.0676403	0.00141943	1.3684	0.0332168	0.147389	0.00222347	0.62147	875.477	14.2532	886.309	12.5014	1.23732
	DHS13-60-2-5	3365.61	250.582	13.4312	0.0430301	0.000475439	0.0727781	0.0027897	1.63619	0.0560987	0.164478	0.00283855	0.503349	984.245	21.618	981.612	15.7228	0.26748
	DHS13-60-2-10	4959.33	510.515	9.71437	0.0412734	0.00063575	0.0690162	0.00150892	1.41656	0.0364444	0.149681	0.00273149	0.709313	895.919	15.3252	899.175	15.3235	0.363477
	DHS13-60-2-11	7096.3	617.92	11.4842	0.0390439	0.000385804	0.0680615	0.00139314	1.38219	0.0279993	0.148184	0.00204826	0.682342	881.372	11.9495	890.776	11.5099	1.06703
	DHS13-60-3-3	7276.59	702.4	10.3596	0.0389568	0.000331362	0.066279	0.00105448	1.30735	0.0233432	0.143735	0.00182795	0.712249	848.961	10.2887	865.748	10.3134	1.97726
	DHS13-60-3-4	6670.9	683.987	9.75296	0.0387952	0.000380867	0.0675093	0.0011555	1.3502	0.0269311	0.145721	0.00208291	0.716627	867.646	11.6503	876.931	11.7291	1.0702
	Note:	Analyzed by LA-ICP-MS in Institute of Geology and Geophysics, Chinese Academy of Sciences (IGG-CAS)
		Disconcordance calculated as ABS(1 – 206Pb-238U age/207Pb-235U age)*100.
	DHS15-103 Mon III
					Data for plot									Dates				Disc.(%)
	Name	Th	U	Th/U	208Pb/232Th	2σ	207Pb/206Pb	2σ	207Pb/235U	2s	206Pb/238U	2σ	rho	207Pb/235U	2σ	206Pb/238U	2σ
	DHS15-103-01	2443.83	331.177	7.37922	0.0459549	0.00104454	0.0696919	0.00603068	1.31101	0.108253	0.137611	0.00368033	0.323892	850.571	47.5664	831.138	20.8599	2.28473
	DHS15-103-02	4298.54	654.378	6.5689	0.0450171	0.000696475	0.0652404	0.00388434	1.20307	0.0698755	0.133898	0.00232172	0.29854	802.004	32.2098	810.067	13.2067	1.00527
	DHS15-103-03	4887.53	599.053	8.15876	0.0448685	0.00071683	0.066805	0.00448404	1.25399	0.0788648	0.137063	0.00296691	0.344189	825.206	35.5316	828.032	16.8264	0.34257
	DHS15-103-04	15326	334.24	45.8531	0.0419768	0.000579043	0.0700455	0.00551054	1.33448	0.102847	0.138876	0.00316726	0.295922	860.833	44.737	838.306	17.9334	2.61688
	DHS15-103-05	25651.9	374.349	68.5239	0.0416945	0.0005709	0.0680064	0.00489899	1.29969	0.0947335	0.138743	0.00308314	0.304872	845.586	41.8316	837.552	17.4595	0.95012
	DHS15-103-06	16212	313.12	51.7756	0.0420802	0.000619394	0.0723718	0.00611659	1.3664	0.113005	0.138613	0.00364245	0.31774	874.62	48.4922	836.812	20.6272	4.32278
	DHS15-103-07	26473.6	339.214	78.0438	0.0394006	0.000589916	0.0664651	0.00564106	1.26037	0.108368	0.137885	0.00319888	0.269822	828.074	48.6835	832.691	18.1281	0.557455
	DHS15-103-08	29625.4	259.442	114.189	0.0418161	0.000623065	0.0710479	0.00726452	1.34175	0.126376	0.14028	0.0038826	0.293855	863.988	54.7999	846.245	21.9545	2.0536
	DHS15-103-09	18057.1	245.928	73.4241	0.041991	0.000652282	0.0709885	0.0075433	1.35516	0.139091	0.139965	0.0043457	0.302506	869.785	59.9692	844.462	24.5788	2.91149
	DHS15-103-10	2101.34	277.229	7.57981	0.0440855	0.00123154	0.0696676	0.00710667	1.29636	0.134771	0.134962	0.0041474	0.295592	844.113	59.5947	816.11	23.5607	3.31752
	DHS15-103-11	17595.5	293.926	59.8638	0.0426653	0.000524728	0.0686179	0.00593644	1.28227	0.100895	0.137648	0.00367462	0.339273	837.864	44.892	831.351	20.8269	0.777308
	DHS15-103-12	20549.9	323.979	63.4298	0.0432289	0.000563159	0.0679151	0.00529665	1.27314	0.0927355	0.138248	0.00369364	0.366796	833.793	41.4277	834.747	20.9236	0.114448
	DHS15-103-13	8483.6	286.851	29.575	0.0468148	0.000682629	0.0682143	0.00561005	1.2913	0.106998	0.138456	0.00341583	0.297738	841.872	47.4194	835.925	19.3471	0.706398
	DHS15-103-14	83387.1	396.367	210.379	0.0415904	0.000582966	0.0630821	0.00667587	1.2026	0.123864	0.138908	0.00381231	0.266464	801.788	57.103	838.482	21.5831	4.57657
	DHS15-103-15	7677.09	266.657	28.7902	0.0454823	0.0012318	0.0675703	0.00704463	1.24277	0.121151	0.135902	0.00382737	0.288894	820.135	54.8523	821.447	21.7255	0.160047
	DHS15-103-16	12107.3	220.15	54.9959	0.0422444	0.000751776	0.0748145	0.00731797	1.38375	0.128693	0.136567	0.00378231	0.297793	882.036	54.8214	825.219	21.4573	6.44155
	DHS15-103-17	19908.3	284.165	70.0588	0.0413223	0.00049546	0.0649657	0.00612412	1.20965	0.110073	0.137005	0.00328055	0.26314	805.029	50.5842	827.702	18.6049	2.81651
	DHS15-103-18	34837.7	225.994	154.153	0.0310568	0.000476152	0.0697943	0.00717898	1.30165	0.143443	0.135258	0.00468868	0.314558	846.451	63.2832	817.792	26.6277	3.38568
	Note:	Analyzed by LA-ICP-MS in Institute of Geology and Geophysics, Chinese Academy of Sciences (IGG-CAS)
		Disconcordance calculated as ABS(1 – 206Pb-238U age/207Pb-235U age)*100.

## Sheet: Table S6
Table S6. LA-ICP-MS U-Pb data for apatite in intensely mineralized rocks in Dahongshan
	DHS14-109 Ap
					Data for plot							Dates				Disc.(%)	Corrected Dates		f206
	Name	Th	U	Th/U	207Pb/206Pb	2σ	207Pb/235U	2s	206Pb/238U	2σ	rho	207Pb/235U	2σ	206Pb/238U	2σ		206Pb*/238U	2σ
	APDHS14-109_1	3.71536	2.385	1.55781	0.0663	0.0069	1.36	0.13	0.1467	0.005	0.045294	865	63	882	28	1.96532	887.491	34.4999	-0.00609654
	APDHS14-109_2	3.27155	2.61933	1.249	0.106	0.012	2.1	0.21	0.145	0.008	0.070563	1159	70	871	45	24.849	785.558	53.2413	0.105685
	APDHS14-109_3	2.33157	2.26339	1.03012	0.141	0.014	3.28	0.35	0.1673	0.0068	0.45619	1433	90	996	37	30.4955	813.682	57.7595	0.194828
	APDHS14-109_4	3.60528	2.75055	1.31075	0.0798	0.0089	1.59	0.18	0.1452	0.0072	0.21473	952	71	873	40	8.29832	847.11	47.1509	0.0326595
	APDHS14-109_5	3.15609	2.63834	1.19624	0.0705	0.0091	1.48	0.19	0.1523	0.0043	0.29861	893	75	913	24	2.23964	911.426	34.14	0.0028219
	APDHS14-109_6	3.44925	3.4724	0.993333	0.0644	0.0071	1.22	0.12	0.1384	0.0052	0.19628	792	58	835	30	5.42929	841.182	35.4033	-0.00707711
	APDHS14-109_7	6.05959	5.35569	1.13143	0.194	0.019	5.78	0.66	0.22	0.015	0.64407	1890	110	1276	78	32.4868	885.649	111.259	0.328852
	APDHS14-109_8	4.26692	3.22696	1.32227	0.0652	0.0076	1.27	0.15	0.1429	0.0063	0.12061	806	65	860	36	6.69975	866.858	42.1769	-0.0071832
	APDHS14-109_9	3.09524	2.36126	1.31084	0.0782	0.0086	1.62	0.16	0.1518	0.0065	0.10702	972	56	910	37	6.3786	889.73	43.81	0.0249161
	APDHS14-109_10	3.68521	2.57333	1.43208	0.0775	0.0088	1.59	0.16	0.1513	0.0069	0.0030211	970	60	907	39	6.49485	888.469	46.1298	0.0231877
	APDHS14-109_11	2.17165	2.50927	0.865451	0.231	0.021	7.9	1	0.249	0.019	0.79455	2200	120	1429	99	35.0455	856.194	142.69	0.427307
	APDHS14-109_12	2.62098	2.23283	1.17384	0.199	0.024	6.15	0.9	0.221	0.016	0.63489	1920	130	1280	86	33.3333	872.07	125.766	0.342733
	APDHS14-109_13	2.44576	1.62095	1.50884	0.106	0.012	2.32	0.27	0.1591	0.0076	0.34841	1186	80	950	42	19.8988	862.237	53.344	0.0999638
	Note:	Analyzed by LA-ICP-MS in China University of Geosciences, Wuhan.
		206Pb*/238U denote rediogenic 206Pb/238U using 207Pb correction method.
		Disconcordance calculated as ABS(1 – 206Pb-238U age/207Pb-235U age)*100.
		f206 refer to the 206Pbcommon/206Pbtotal calculated by equation (207Pb/206Pbmeasured – 207Pb*/206Pb*)/(207Pb/206Pbcommon – 207Pb*/206Pb*) and corrected date.
	Reference
					Data for plot							Dates				Disc.(%)	Corrected Dates
	Name	Th	U	Th/U	207Pb/206Pb	2σ	207Pb/235U	2s	206Pb/238U	2σ	rho	207Pb/235U	2σ	206Pb/238U	2σ		206Pb*/238U	2σ
	Durango (30.7 ± 2.4 Ma)
	DRG-1	420.876	15.5101	27.1356	0.321601	0.0474997	0.266942	0.039729	0.00656567	0.000704024	0.471012	240.246	31.851	42.1867	4.50883	82.4402	27.5524	3.92726
	DRG-2	387.878	19.1771	20.2261	0.228806	0.0530457	0.191661	0.0453933	0.00634232	0.000681509	0.290809	178.045	38.6972	40.7561	4.3656	77.1092	31.3941	4.35015
	DRG-3	382.434	19.3456	19.7685	0.282858	0.0492117	0.233326	0.0429135	0.00645107	0.000643227	0.516563	212.941	35.3444	41.4527	4.11993	80.5332	29.1014	3.90581
	DRG-4	396.484	19.6798	20.1468	0.245104	0.0393037	0.211213	0.042105	0.00643638	0.000618258	0.637475	194.57	35.3116	41.3586	3.96006	78.7436	31.0076	3.63488
	DRG-5	394.382	19.6474	20.073	0.238307	0.0411666	0.248676	0.0597945	0.00723046	0.000742699	0.548601	225.5	48.6601	46.4428	4.75337	79.4045	35.2247	4.36523
	DRG-6	389.879	21.3537	18.2582	0.22722	0.0372717	0.215943	0.0499003	0.00684116	0.000717493	0.625739	198.528	41.693	43.9508	4.59383	77.8617	33.947	4.12975
	DRG-7	396.933	19.9845	19.862	0.228848	0.0401993	0.18002	0.028523	0.00616006	0.000561857	0.0047745	168.078	24.5483	39.5885	3.59979	76.4464	30.4913	3.44509
	DRG-8	174.104	10.327	16.8591	0.40757	0.0943514	0.318837	0.0511726	0.00703731	0.000860892	0.0578876	281.008	39.418	45.2065	5.51088	83.9127	24.6164	6.22388
	Note:	Analyzed by LA-ICP-MS in China University of Geosciences, Wuhan.
		The international apatite reference has a reported age of 31.44 ± 0.18 Ma (McDowell et al., 2005, Chemical Geology 214 (3-4): 249-263).
		206Pb*/238U denote rediogenic 206Pb/238U using 207Pb correction method.
		Disconcordance calculated as ABS(1 – 206Pb-238U age/207Pb-235U age)*100.

## Sheet: Table S7
Table S7. LA-ICP-MS U-Pb data for rutile in metasomatic rocks in Dahongshan
	DHS14-98 Rt
					Data for plot							Dates				Disc.(%)
	Name	Th	U	Th/U	207Pb/206Pb	2σ	207Pb/235U	2s	206Pb/238U	2σ	rho	207Pb/235U	2σ	206Pb/238U	2σ
	DHS14-98RT-01	0.0618011	19.637	0.00314717	0.0680182	0.00923024	1.44472	0.169401	0.158902	0.00554929	0.297836	907.682	70.3612	950.671	30.8723	4.73608
	DHS14-98RT-02	2.73217	20.6888	0.132061	0.0731607	0.0101652	1.552	0.201681	0.159111	0.00915279	0.442671	951.291	80.2468	951.835	50.906	0.0571849
	DHS14-98RT-03	0.753644	19.0819	0.0394952	0.0700225	0.0108964	1.43218	0.195658	0.154417	0.00662954	0.31426	902.46	81.6854	925.673	37.0236	2.5722
	DHS14-98RT-04	0.0558478	18.412	0.00303322	0.0666582	0.0102097	1.42509	0.206826	0.157029	0.0082715	0.362945	899.495	86.6001	940.244	46.0876	4.53022
	DHS14-98RT-05	0.503634	16.6754	0.0302021	0.0745263	0.0142693	1.51277	0.239361	0.148429	0.00906919	0.386162	935.561	96.7251	892.151	50.9099	4.6399
	DHS14-98RT-06	0.596057	17.366	0.0343233	0.0625573	0.0101273	1.39617	0.212099	0.161005	0.00652178	0.266641	887.313	89.8795	962.358	36.2156	8.45766
	DHS14-98RT-07	0.197588	15.7662	0.0125324	0.066145	0.00941306	1.4042	0.192347	0.155986	0.00714239	0.334273	890.712	81.2376	934.432	39.8331	4.9085
	DHS14-98RT-08	0.522644	16.8252	0.0310631	0.0692917	0.0103976	1.44913	0.20849	0.155912	0.00814257	0.362998	909.511	86.4398	934.02	45.4132	2.69464
	DHS14-98RT-09	0.281451	16.1529	0.0174241	0.0698629	0.00949609	1.52446	0.188666	0.160314	0.00723695	0.36476	940.273	75.8873	958.524	40.21	1.94105
	DHS14-98RT-10	0.234786	18.265	0.0128544	0.0641576	0.00895039	1.35133	0.173929	0.155217	0.0058498	0.292815	868.134	75.1104	930.141	32.6473	7.14262
	DHS14-98RT-11	0.14202	16.048	0.00884972	0.0762184	0.00993594	1.54403	0.185633	0.150909	0.00619664	0.34154	948.115	74.0934	906.058	34.7118	4.43583
	DHS14-98RT-12	1.10525	17.6483	0.0626263	0.070378	0.0107951	1.57527	0.209751	0.163542	0.00883647	0.405789	960.504	82.7036	976.43	48.9599	1.65808
	DHS14-98RT-13	0.608555	18.3061	0.0332433	0.0766685	0.00959608	1.60816	0.192336	0.155118	0.00600487	0.323676	973.391	74.8813	929.588	33.5154	4.50003
	DHS14-98RT-14	0.279366	17.0026	0.0164307	0.0726962	0.00823792	1.56135	0.185581	0.155916	0.00647398	0.349337	955.001	73.5719	934.043	36.1081	2.19456
	DHS14-98RT-15	0.56406	21.1276	0.0266978	0.069191	0.00941805	1.49936	0.204462	0.158285	0.0061993	0.287208	930.126	83.0664	947.239	34.5059	1.83983
	DHS14-98RT-16	1.25515	20.9385	0.0599445	0.0685853	0.0100418	1.42336	0.177059	0.154711	0.00591766	0.307487	898.772	74.19	927.315	33.0404	3.17578
	DHS14-98RT-17	0.365335	18.9938	0.0192345	0.0765598	0.0104173	1.61015	0.203629	0.15572	0.00635381	0.322639	974.165	79.2171	932.948	35.4441	4.23105
	DHS14-98RT-18	0.374447	20.5642	0.0182087	0.072357	0.0090455	1.47143	0.17297	0.150102	0.00547526	0.310304	918.714	71.0673	901.533	30.6932	1.87008
	DHS14-98RT-19	0.317564	15.7927	0.0201083	0.0680199	0.00932218	1.43362	0.189785	0.152584	0.00706782	0.349903	903.06	79.1866	915.434	39.5335	1.37017
	DHS14-98RT-20	0.224538	21.9883	0.0102117	0.0704554	0.00955529	1.5044	0.19824	0.159371	0.0072021	0.342942	932.173	80.3769	953.282	40.0489	2.26454
	DHS14-98RT-21	0.199429	15.1005	0.0132067	0.0708396	0.0165423	1.50499	0.327223	0.156946	0.00731948	0.214497	932.411	132.639	939.782	40.7867	0.790514
	DHS14-98RT-22	0.294467	16.7679	0.0175613	0.0724733	0.0104392	1.51395	0.202936	0.154977	0.00725913	0.349437	936.036	81.9682	928.804	40.5194	0.772586
	Note:	Analyzed by LA-ICP-MS in China University of Geosciences, Wuhan.
	Reference
					Data for plot							Dates				Disc.(%)
	Name	Th	U	Th/U	207Pb/206Pb	2σ	207Pb/235U	2s	206Pb/238U	2σ	rho	207Pb/235U	2σ	206Pb/238U	2σ
	GJ-1 (604 ± 6 Ma)
	GJ-1	29.5232	940.48	0.0313917	0.0623535	0.00280016	0.846327	0.0374359	0.0979233	0.00168173	0.388259	622.631	20.5921	602.227	9.87958	3.277
	GJ-1	28.0274	894.013	0.0313501	0.061108	0.00304499	0.833194	0.042632	0.0985701	0.00175225	0.347426	615.383	23.617	606.024	10.2874	1.52082
	GJ-1	28.4806	906.759	0.0314092	0.0587276	0.00310325	0.798441	0.0433851	0.0982921	0.00175571	0.328728	595.949	24.4982	604.392	10.3103	1.41678
	Note:	Analyzed by LA-ICP-MS in China University of Geosciences, Wuhan.
		The international zircon reference has a reported age of 601.86 ± 0.37 Ma (Horstwood et al., 2016, Geostandards and Geoanalytical Research 40 (3): 311-332).

## Sheet: Table S8
Table S8. Re-Os data for molybdenite in actinolite-calcite veins in metasomatic rocks in Dahongshan
	Sample	Breif sample description	wt	Re(ppm)	2σ	187Re(ppm)	2σ	187Os(ppb)		Age	± (Ma)
	DHS13_88	Moly in Act vein	0.01	351.14	1.78	220.7	1.12	3245.7	15.12	876.31	3.52
	DHS13_89	Moly in Act vein	0.01	339.65	1.7	213.47	1.07	3138.69	14.45	876.11	3.53
	Note:	Analyzed in Durham University
		Ages calculated using 187Os = 187Re (eλt-1); decay constant (λ) used for 187Re is 1.666 × 10–11 a-1 (± 0.31%, Smoliar et al., 1996)
		Data are presented with 187Re decay constant uncertainty (Smoliar et al., 1996; Selby et al., 2007)

## Sheet: Table S9
Table S9. Summary of geochronology samples and results in Dahongshan Group
	Sample ID	Description	Mineral	Methods	Age	Ref.
	Sm-Nd
		Host volcanic rocks	WR	ID-TIMS	1657 ± 82	1
		Intensely mineralized rocks	WR	ID-TIMS	783 ± 180	8
	U-Pb
		Vocanic rocks	Zr	SHRIMP/LA-ICP-MS	1711-1665	1, 2, 4
		Dolerite crosscutting Cu ores	Zr	LA-ICP-MS	1661 ± 7	8
		Dolerite crosscutting Fe ores	Zr	LA-ICP-MS	1659 ± 16	3
		Amphibolite	Meta.Zr	LA-ICP-MS	849 ± 12	5
		Altered Zr within Cu ores	Hy.Zr	LA-ICP-MS	1653 ± 18	8
	DHS13-43	Intensely mineralized IASD	Aln I	SHRIMP/LA-ICP-MS	940 ± 11 (18)
	DHS13-42	Intensely mineralized IASD	Aln II	fs-LA-ICP-MS	Core 941 ± 10 (21)
					Rim 843 ± 8 (13)
	DHS10-74	Cement in post-ore breccia	Aln III	fs-LA-ICP-MS	Core N/A
					Rim1 1139 ± 17 (30)
					Rim2 936 ± 26 (17)
	DHS13-60	Intensely mineralized dolostone	Mon I	SHRIMP/LA-ICP-MS	Core 1035-1212 (5)
					Rim1 927 ± 4 (17)
					Rim2 833 ± 8 (7)
	DSH13-71	Intensely mineralized dolostone	Mon II	SHRIMP	Core 872 ± 12 (19)
					Rim 828 ± 16 (11)
	DHS15-103	Altered volcanics	Mon III	LA-ICP-MS	830 ± 5 (18)
	DHS14-109	Mineralized volcanics	Ap	LA-ICP-MS	867 ± 21 (13)
	DHS14-98-3	Albitized dolostone	Rt	LA-ICP-MS	933 ± 8 (22)
	Re-Os
	DHS13-88	Distorted Act-Ank-Cal vein.	Mbd	ID-TIMS	876.31 ± 3.52 (1)
	DHS13-89	Distorted Act-Ank-Cal vein.	Mbd	ID-TIMS	876.11 ± 3.53 (1)
		Discordant Cal-Ccp veins	Ccp	MC-ICP-MS	1113 ± 14	7
		Discordant Py-Ccp veins	Py+Ccp	MC-ICP-MS	1026 ± 22	8
		Flake Mbd along foliation	Mbd	MC-ICP-MS	833 ± 8	8
		Flake Mbd along foliation	Mbd	MC-ICP-MS	799 ± 13	8
	Ar-Ar
		Amphibolite	Amp		831 ± 20	4
		Garnet-biotite schist	Bt		851 ± 9	4
		Garnet-muscovite schist	Ms		838 ± 4	5
		Garnet-muscovite schist	Ms		845 ± 4	5
	Notes:	Ages in bold are new data in this study; numbers in parentheses denote valid number of analyses.
		Abbreviations: WR–whole rock; Zr–zircon; Meta.–metamorphic; Hy.–hydrothermal; Aln–allanite; Mon–monazite; Ap–apatite; Rt–rutile; Mbd–molybdenite; Ccp–chalcopyrite; Py–pyrite; Amp–amphibolite; Bt–biotite; Ms–muscovite; Act–actinolite; Ank–ankerite; Cal–calcite.
		References: 1–Hu et al., 1991; 2–Greentree and Li, 2008; 3–Zhao and Zhou, 2011; 4–Yang et al., 2012; 5–Yang et al., 2013; 6–Zhou et al., 2014; 7–Jing et al., 2017; 8–Zhao et al., 2017. Detailed information as referenced in text.

## Sheet: Table S10
Table S10. References of data sources for host sequences, major magmatism events, metamorphism, and deformation events, and reported hydrothermal events of major IOCG provinces compiled in Fig. 14
References for Great Bear:
Acosta-Góngora, P., Gleeson, S.A., Samson, I.M., Corriveau, L., Ootes, L., Taylor, B.E., Creaser, R.A., Muehlenbachs, K., 2015. Genesis of the Paleoproterozoic NICO iron oxide–cobalt–gold–bismuth deposit, Northwest Territories, Canada: Evidence from isotope geochemistry and fluid inclusions. Precambrian Research, 268: 168-193.
Gandhi, S.S., Mortensen, J.K., Prasad, N., Breemen, O.v., 2001. Magmatic evolution of the southern Great Bear continental arc, northwestern Canadian Shield: geochronological constraints. Canadian Journal of Earth Sciences, 38(5): 767-785.
Gandhi, S.S., Breemen, O.v., 2005. SHRIMP U-Pb geochronology of detrital zircons from the Treasure Lake Group  new evidence for Paleoproterozoic collisional tectonics in the southern Hottah terrane, northwestern Canadian Shield. Canadian Journal of Earth Sciences, 42(5): 833-845.
Montreuil, J.F., Corriveau, L., Davis, W.J., 2016. Tectonomagmatic evolution of the southern Great Bear magmatic zone (Northwest Territories, Canada): Implications for the genesis of iron oxide-alkali-altered hydrothermal systems. Economic Geology, 111(8): 2111-2138.
Ootes, L., Goff, S., Jackson, V.A., Gleeson, S.A., Creaser, R.A., Samson, I.M., Evensen, N., Corriveau, L., Mumin, A.H., 2010. Timing and thermochemical constraints on multi-element mineralisation at the Nori/RA Cu–Mo–U prospect, Great Bear magmatic zone, Northwest Territories, Canada. Mineralium Deposita, 45(6): 549-566.
Ootes, L., Davis, W.J., Jackson, V.A., van Breemen, O., Corfu, F., 2015. Chronostratigraphy of the Hottah terrane and Great Bear magmatic zone of Wopmay Orogen, Canada, and exploration of a terrane translation model. Canadian Journal of Earth Sciences, 52(12): 1062-1092.
Ootes, L., Snyder, D., Davis, W.J., Acosta-Góngora, P., Corriveau, L., Mumin, A.H., Gleeson, A.S., Samson, I.M., Montreuil, J.F., Potter, E.G., Jackson, V.A., 2017. A Paleoproterozoic Andean-type iron oxide copper-gold environment, the Great Bear magmatic zone, Northwest Canada. Ore Geology Reviews, 81: 123-139.
References for Tennant Creek:
Claoué-Long, J., Maidment, D., Donnellan, N., 2008. Stratigraphic timing constraints in the Davenport Province, central Australia: A basis for Palaeoproterozoic correlations. Precambrian Research, 166(1-4): 204-218.
Compston, D.M., 1995. Time constraints on the evolution of the Tennant Creek Block, northern Australia. Precambrian Research, 71(1-4): 107-129.
Cross, A.J., Kositcin, N., Schofield, A., Clark, A.D., 2020. New SHRIMP U-Pb zircon and monazite geochronology of the East Tennant region: a possible undercover extension of the Warramunga Province, Tennant Creek, Geoscience Australia, pp. 4.
Fraser, G.L., Hussey, K., Compston, D.M., 2008. Timing of Palaeoproterozoic Au–Cu–Bi and W-mineralization in the Tennant Creek region, northern Australia: Improved constraints via intercalibration of 40Ar/39Ar and U–Pb ages. Precambrian Research, 164(1-2): 50-65.
Maidment, D.W., Huston, D.L., Donnellan, N., Lambeck, A., 2013. Constraints on the timing of the Tennant Event and associated Au–Cu–Bi mineralisation in the Tennant Region, Northern Territory. Precambrian Research, 237: 51-63.
Skirrow, R.G., Cross, A.J., Lecomte, A., Mercadier, J., 2019. A shear-hosted Au-Cu-Bi metallogenic event at ~1660 Ma in the Tennant Creek goldfield (northern Australia) defined by in-situ monazite U-Pb-Th dating. Precambrian Research, 332: 105402.
Smith, J., 2001. Summary of results-Joint NTGS-AGSO Age Determination Program 1999-2001. In: Survey, N.T.G. (Editor), Darwin pp. 59.
Skirrow, R., 2021. Iron oxide copper-gold (IOCG) deposits–a review (part 1): settings, mineralogy, ore geochemistry, and classification. Ore Geology Reviews, 140: 104569.
References for Cloncurry:
Austin, J., Gazley, M., Walshe, J., Patterson, B., 2016. Uncover Cloncurry review-Integrated structural, metasomatic and metallogenic history of the Cloncurry District. Report.
Australia, G., 2021. 2.4 Iron oxide copper-gold mineral system, Geoscience Australia, Online website.
Babo, J., Spandler, C., Oliver, N.H., Brown, M., Rubenach, M.J., Creaser, R.A., 2017. The High-Grade Mo-Re Merlin Deposit, Cloncurry District, Australia: Paragenesis and Geochronology of Hydrothermal Alteration and Ore Formation. Economic Geology, 112(2): 397-422.
Baker, T., Mustard, R., Fu, B., Williams, P.J., Dong, G., Fisher, L., Mark, G., Ryan, C.G., 2008. Mixed messages in iron oxide–copper–gold systems of the Cloncurry district, Australia: insights from PIXE analysis of halogens and copper in fluid inclusions. Mineralium Deposita, 43(6): 599-608.
Blenkinsop, T., Huddlestone-Holmes, C., Lepong, P., Edmiston, M., Foster, D., Austin, J., Mark, G., Ford, A., Murphy, B., 2019. Inversion in the Eastern Succession of the Mt Isa inlier: A key to crustal architecture. ASEG Extended Abstracts, 2006(1): 1-6.
Cave, B., Lilly, R., Glorie, S., Gillespie, J., 2018. Geology, Apatite Geochronology, and Geochemistry of the Ernest Henry Inter-Lens: Implications for a Re-Examined Deposit Model. Minerals, 8(9): 405.
Duncan, R.J., Stein, H.J., Evans, K.A., Hitzman, M.W., Nelson, E.P., Kirwin, D.J., 2011. A new geochronological framework for mineralization and alteration in the Selwyn-Mount Dore corridor, Eastern fold belt, Mount Isa inlier, Australia: Genetic implications for iron oxide copper-gold deposits. Economic Geology, 106(2): 169-192.
Fisher, L., 2007. Hydrothermal processes at the Osborne Fe-Oxide-Cu-Au deposit, N.W. Queensland: integration of multiple micro-analytical data sets to trace ore fluid sources, James Cook University, Townsville, 138 pp.
Fisher, L.A., Kendrick, M.A., 2008. Metamorphic fluid origins in the Osborne Fe oxide–Cu–Au deposit, Australia: evidence from noble gases and halogens. Mineralium Deposita, 43(5): 483-497.
Foster, D., Austin, J., 2008. The 1800–1610Ma stratigraphic and magmatic history of the Eastern Succession, Mount Isa Inlier, and correlations with adjacent Paleoproterozoic terranes. Precambrian Research, 163(1-2): 7-30.
Fraser, G.L., Hussey, K., Compston, D.M., 2008. Timing of Palaeoproterozoic Au–Cu–Bi and W-mineralization in the Tennant Creek region, northern Australia: Improved constraints via intercalibration of 40Ar/39Ar and U–Pb ages. Precambrian Research, 164(1-2): 50-65.
Gibson, G.M., Champion, D.C., Withnall, I.W., Neumann, N.L., Hutton, L.J., 2018. Assembly and breakup of the Nuna supercontinent: Geodynamic constraints from 1800 to 1600 Ma sedimentary basins and basaltic magmatism in northern Australia. Precambrian Research, 313: 148-169.
Hamilton, M.A., Buchan, K.L., 2010. U–Pb geochronology of the Western Channel Diabase, northwestern Laurentia: Implications for a large 1.59Ga magmatic province, Laurentia's APWP and paleocontinental reconstructions of Laurentia, Baltica and Gawler craton of southern Australia. Precambrian Research, 183(3): 463-473.
Mark, G., Oliver, N.H.S., Williams, P.J., 2006. Mineralogical and chemical evolution of the Ernest Henry Fe oxide–Cu–Au ore system, Cloncurry district, northwest Queensland, Australia. Mineralium Deposita, 40(8): 769-801.
Medig, K.P.R., Thorkelson, D.J., Davis, W.J., Rainbird, R.H., Gibson, H.D., Turner, E.C., Marshall, D.D., 2014. Pinning northeastern Australia to northwestern Laurentia in the Mesoproterozoic. Precambrian Research, 249: 88-99.
Olga, B., 2019. The Geological Architecture of the Iron-Oxide Copper Gold (IOCG) corridor at the Mt Isa Inlier, Australian National University, Canberra, 228 pp.
Oliver, N., Butera, K., Rubenach, M., Marshall, L., Cleverley, J., Mark, G., Tullemans, F., Esser, D., 2008. The protracted hydrothermal evolution of the Mount Isa Eastern Succession: A review and tectonic implications. Precambrian Research, 163(1-2): 108-130.
Perkins, C., Wyborn, L.A.I., 1998. Age of Cu‐Au mineralisation, Cloncurry district, eastern Mt Isa Inlier, Queensland, as determined by40Ar/39Ar dating. Australian Journal of Earth Sciences, 45(2): 233-246.
Porter, T.M., 2010. Current understanding of iron oxide associated-alkali altered mineralised systems: Part I—an overview. In: Porter, T.M. (Ed.), Hydrothermal iron oxide copper-gold and related deposits: A global perspective. PGC Publishing, Adelaide, pp. 5-32.
Rubenach, M., Foster, D., Evins, P., Blake, K., Fanning, C., 2008. Age constraints on the tectonothermal evolution of the Selwyn Zone, Eastern Fold Belt, Mount Isa Inlier. Precambrian Research, 163(1-2): 81-107.
Skirrow, R., 2021. Iron oxide copper-gold (IOCG) deposits–a review (part 1): settings, mineralogy, ore geochemistry, and classification. Ore Geology Reviews, 140: 104569.
Southgate, P.N., Neumann, N.L., Gibson, G.M., 2013. Depositional systems in the Mt Isa Inlier from 1800 Ma to 1640 Ma: Implications for Zn–Pb–Ag mineralisation. Australian Journal of Earth Sciences, 60(2): 157-173.
Spence, J.S., Sanislav, I.V., Dirks, P.H.G.M., 2021. 1750–1710 Ma deformation along the eastern margin of the North Australia Craton. Precambrian Research, 353: 106019.
WILLIAMS, P.J., POLLARD, P.J., 2001. Australian Proterozoic iron oxide-Cu-Au deposits: An overview with new metallogenic and exploration data from the Cloncurry district, northwest Queensland. Exploration and Mining Geology, 10(3): 191-213.
References for Wernecke Breccia:
Crawford, B.L., Betts, P.G., Aillères, L., 2010. An aeromagnetic approach to revealing buried basement structures and their role in the Proterozoic evolution of the Wernecke Inlier, Yukon Territory, Canada. Tectonophysics, 490(1-2): 28-46.
Eyster, A.E., Fu, R.R., Strauss, J.V., Weiss, B.P., Roots, C.F., Halverson, G.P., Evans, D.A.D., Macdonald, F.A., 2017. Paleomagnetic evidence for a large rotation of the Yukon block relative to Laurentia: Implications for a low-latitude Sturtian glaciation and the breakup of Rodinia. Geological Society of America Bulletin, 129(1-2): 38-58.
Furlanetto, F., Thorkelson, D.J., Daniel Gibson, H., Marshall, D.D., Rainbird, R.H., Davis, W.J., Crowley, J.L., Vervoort, J.D., 2013. Late Paleoproterozoic terrane accretion in northwestern Canada and the case for circum-Columbian orogenesis. Precambrian Research, 224: 512-528.
Furlanetto, F., Thorkelson, D.J., Rainbird, R.H., Davis, W.J., Gibson, H.D., Marshall, D.D., 2016. The Paleoproterozoic Wernecke Supergroup of Yukon, Canada: Relationships to orogeny in northwestern Laurentia and basins in North America, East Australia, and China. Gondwana Research, 39: 14-40.
Harlan, S.S., Heaman, L., LeCheminant, A.N., Premo, W.R., 2003. Gunbarrel mafic magmatic event: A key 780 Ma time marker for Rodinia plate reconstructions. Geology, 31(12): 1053-1056.
Heaman, L.M., LeCheminant, A.N., Rainbird, R.H., 1992. Nature and timing of Franklin igneous events, Canada: implications for a Late Proterozoic mantle plume and the break-up of Laurentia. Earth and Planetary Science Letters, 109(1-2): 117-131.
Hunt, J.A., Baker, T., Cleverley, J., Davidson, G.J., Fallick, A.E., Thorkelson, D.J., Harris, A., 2011. Fluid inclusion and stable isotope constraints on the origin of Wernecke Breccia and associated iron oxide – copper – gold mineralization, Yukon. Canadian Journal of Earth Sciences, 48(10): 1425-1445.
Jefferson, C.W., Parrish, R.R., 1989. Late Proterozoic stratigraphy, U–Pb zircon ages, and rift tectonics, Mackenzie Mountains, northwestern Canada. Canadian Journal of Earth Sciences, 26(9): 1784-1801.
Medig, K.P.R., Thorkelson, D.J., Dunlop, R.L., 2010. The Proterozoic Pinguicula Group: Stratigraphy, contact relationships and possible correlations, Yukon Geological Survey.
Medig, K.P.R., Turner, E.C., Thorkelson, D.J., Rainbird, R.H., 2016. Rifting of Columbia to form a deep-water siliciclastic to carbonate succession: The Mesoproterozoic Pinguicula Group of northern Yukon, Canada. Precambrian Research, 278: 179-206.
Narbonne, G.M., Aitken, J.D., 1995. Neoproterozoic of the mackenzie mountains, Northwestern Canada. Precambrian Research, 73(1-4): 101-121.
Nielsen, A.B., 2011. The Wernecke igneous clasts in Yukon, Canada: evidence for a Paleoproterozoic volcanic arc terrane at 1.7 Ga and its obduction onto ancestral North America, Simon Fraser University, Vancouver, 127 pp.
Nielsen, A.B., Thorkelson, D.J., Gibson, H.D., Marshall, D.D., 2013. The Wernecke igneous clasts in Yukon, Canada: Fragments of the Paleoproterozoic volcanic arc terrane Bonnetia. Precambrian Research, 238: 78-92.
Ootes, L., Gleeson, S.A., Turner, E., Rasmussen, K., Gordey, S., Falck, H., Martel, E., Pierce, K., 2013. Metallogenic Evolution of the Mackenzie and Eastern Selwyn Mountains of Canada’s Northern Cordillera, Northwest Territories: A Compilation and Review. Geoscience Canada, 40(1).
Parrish, R.R., Bell, R.T., 1987. Age of the NOR breccia pipe, Wernecke Supergroup, Yukon Territory, Geol. Surv. Can. Pap.
Rogers, C., Kamo, S.L., Söderlund, U., Hamilton, M.A., Ernst, R.E., Cousens, B., Harlan, S.S., Wade, C.E., Thorkelson, D.J., 2018. Geochemistry and U-Pb geochronology of 1590 and 1550 Ma mafic dyke swarms of western Laurentia: Mantle plume magmatism shared with Australia. Lithos, 314-315: 216-235.
Schwab, D.L., Thorkelson, D.J., Mortensen, J.K., Creaser, R.A., Abbott, J.G., 2004. The Bear River dykes (1265–1269 Ma): westward continuation of the Mackenzie dyke swarm into Yukon, Canada. Precambrian Research, 133(3-4): 175-186.
Thorkelson, D.J., 2000. Geology and mineral occurrences of the Slats Creek, Fairchild Lake and" Dolores Creek" areas, Wernecke Mountains (106D/16, 106C/13, 106C/14), Yukon Territory, Exploration and Geological Services Division, Yukon, Indian and Northern Affairs Canada.
Thorkelson, D.J., Mortensen, J.K., Davidson, G.J., Creaser, R.A., Perez, W.A., Abbott, J.G., 2001. Early Mesoproterozoic intrusive breccias in Yukon, Canada: the role of hydrothermal systems in reconstructions of North America and Australia. Precambrian Research, 111(1-4): 31-55.
Thorkelson, D.J., Abbott, J.G., Mortensen, J.K., Creaser, R.A., Villeneuve, M.E., McNicoll, V.J., Layer, P.W., 2005. Early and Middle Proterozoic evolution of Yukon, Canada. Canadian Journal of Earth Sciences, 42(6): 1045-1071.
Thorkelson, D.J., Laughton, J.R., 2016. Paleoproterozoic closure of an Australia–Laurentia seaway revealed by megaclasts of an obducted volcanic arc in Yukon, Canada. Gondwana Research, 33: 115-133.
Turner, E.C., Long, D.G.F., 2008. Basin architecture and syndepositional fault activity during deposition of the Neoproterozoic Mackenzie Mountains supergroup, Northwest Territories, CanadaNorthwest Territories Geoscience Office Contribution 0040. Canadian Journal of Earth Sciences, 45(10): 1159-1184.
van Breemen, O., Stem, R., Davis, B., Skulski, T., 1997. RADIOGENIC AGE AND ISOTOPIC STUDIES: REPORT 10, GEOLOGICAL SURVEY OF CANADA.
Verbaas, J., Thorkelson, D.J., Crowley, J., Davis, W.J., Foster, D.A., Gibson, H.D., Marshall, D.D., Milidragovic, D., 2018a. A sedimentary overlap assemblage links Australia to northwestern Laurentia at 1.6 Ga. Precambrian Research, 305: 19-39.
Verbaas, J., Thorkelson, D.J., Milidragovic, D., Crowley, J.L., Foster, D., Daniel Gibson, H., Marshall, D.D., 2018b. Rifting of western Laurentia at 1.38 Ga: The Hart River sills of Yukon, Canada. Lithos, 316-317: 243-260.
Xia, X., Nie, X., Lai, C.-K., Wang, Y., Long, X., Meffre, S., 2016. Where was the Ailaoshan Ocean and when did it open: A perspective based on detrital zircon U–Pb age and Hf isotope evidence. Gondwana Research, 36: 488-502.
Young, G.M., Jefferson, C.W., Delaney, G.D., Yeo, G.M., 1979. Middle and late Proterozoic evolution of the northern Canadian Cordillera and Shiel. Geology, 7(3): 125-128.
References for eastern Gawler and Curnamona:
Aleinikoff, J.N., Selby, D., Slack, J.F., Day, W.C., Pillers, R.M., Cosca, M.A., Seeger, C.M., Fanning, C.M., Samson, I.M., 2016. U-Pb, Re-Os, and Ar/Ar geochronology of rare earth element (REE)-rich breccia pipes and associated host rocks from the Mesoproterozoic Pea Ridge Fe-REE-Au deposit, St. Francois Mountains, Missouri. Economic Geology, 111(8): 1883-1914.
Andersson, J.B., Bauer, T.E., Martinsson, O., 2021. Structural Evolution of the Central Kiruna Area, Northern Norrbotten, Sweden: Implications on the Geologic Setting Generating Iron Oxide-Apatite and Epigenetic Iron and Copper Sulfides. Economic Geology, 116(8): 1981-2009.
Apukhtina, O.B., Kamenetsky, V.S., Ehrig, K., Kamenetsky, M.B., McPhie, J., Maas, R., Meffre, S., Goemann, K., Rodemann, T., Cook, N.J., Ciobanu, C.L., 2015. Postmagmatic magnetite–apatite assemblage in mafic intrusions: a case study of dolerite at Olympic Dam, South Australia. Contributions to Mineralogy and Petrology, 171(1).
Apukhtina, O.B., Kamenetsky, V.S., Ehrig, K., Kamenetsky, M.B., Maas, R., Thompson, J., McPhie, J., Ciobanu, C.L., Cook, N.J., 2017. Early, deep magnetite-fluorapatite mineralization at the Olympic Dam Cu-U-Au-Ag deposit, South Australia. Economic Geology, 112(6): 1531-1542.
Armbruster, T., Bonazzi, P., Akasaka, M., Bermanec, V., Chopin, C., Gieré, R., Heuss-Assbichler, S., Liebscher, A., Menchetti, S., Pan, Y., Pasero, M., 2006. Recommended nomenclature of epidote-group minerals. European Journal of Mineralogy, 18(5): 551-567.
Armistead, S.E., Betts, P.G., Ailleres, L., Armit, R.J., Williams, H.A., 2018. Cu-Au mineralisation in the Curnamona Province, South Australia: A hybrid stratiform genetic model for Mesoproterozoic IOCG systems in Australia. Ore Geology Reviews, 94: 104-117.
Belperio, A., Flint, R., Freeman, H., 2007. Prominent Hill: A hematite-dominated, iron oxide copper-gold system. Economic Geology, 102(8): 1499-1510.
Betts, P.G., Giles, D., Schaefer, B.F., Mark, G., 2007. 1600–1500 Ma hotspot track in eastern Australia: implications for Mesoproterozoic continental reconstructions. Terra Nova, 19(6): 496-501.
Betts, P.G., Giles, D., Foden, J., Schaefer, B.F., Mark, G., Pankhurst, M.J., Forbes, C.J., Williams, H.A., Chalmers, N.C., Hills, Q., 2009. Mesoproterozoic plume-modified orogenesis in eastern Precambrian Australia. Tectonics, 28(3): n/a-n/a.
Bowden, B., Fraser, G., Davidson, G.J., Meffre, S., Skirrow, R., Bull, S., Thompson, J., 2016. Age constraints on the hydrothermal history of the Prominent Hill iron oxide copper-gold deposit, South Australia. Mineralium Deposita, 52(6): 863-881.
Cherry, A.R., Ehrig, K., Kamenetsky, V.S., McPhie, J., Crowley, J.L., Kamenetsky, M.B., 2018. Precise geochronological constraints on the origin, setting and incorporation of ca. 1.59 Ga surficial facies into the Olympic Dam Breccia Complex, South Australia. Precambrian Research, 315: 162-178.
Conor, C., Raymond, O., Baker, T., Teale, G., Say, P., Lowe, G., 2010. Alteration and mineralisation in the Moonta-Wallaroo copper-gold mining field region, Olympic Domain, South Australia. In: Porter, T.M. (Ed.), Hydrothermal iron oxide copper-gold & related deposits: A global perspective. PGC Publishing, Adelaide, pp. 1-24.
Conor, C.H.H., Preiss, W.V., 2008. Understanding the 1720–1640Ma Palaeoproterozoic Willyama Supergroup, Curnamona Province, Southeastern Australia: Implications for tectonics, basin evolution and ore genesis. Precambrian Research, 166(1-4): 297-317.
Courtney-Davies, L., Ciobanu, C.L., Tapster, S.R., Cook, N.J., Ehrig, K., Crowley, J.L., Verdugo-Ihl, M.R., Wade, B.P., Condon, D.J., 2020. Opening the magmatic-hydrothermal window: High-precision U-Pb geochronology of the Mesoproterozoic Olympic Dam Cu-U-Au-Ag deposit, South Australia. Economic Geology, 115(8): 1855-1870.
Davidson, G.J., Paterson, H.L., Meffre, S., Berry, R., 2007. Characteristics and origin of the breccia hosted, Cu-U-rich, Oak Dam East ironstone: Olympic Dam-like mineralization beneath the Stuart Shelf. Economic Geology, 102: 1471-1498.
Ehrig, K., Kamenetsky, V.S., McPhie, J., Macmillan, E., Thompson, J., Kamenetsky, M., Maas, R., 2021. Staged formation of the supergiant Olympic Dam uranium deposit, Australia. Geology, 49(11): 1312-1316.
Ernst, R.E., Hamilton, M.A., Söderlund, U., Hanes, J.A., Gladkochub, D.P., Okrugin, A.V., Kolotilina, T., Mekhonoshin, A.S., Bleeker, W., LeCheminant, A.N., Buchan, K.L., Chamberlain, K.R., Didenko, A.N., 2016. Long-lived connection between southern Siberia and northern Laurentia in the Proterozoic. Nature Geoscience, 9(6): 464-469.
Fanning, C.M., Flint, R.B., Preiss, W.V., 1983. Geochronology of the Pandurra Formation. In: Notes, S.A.G.S.Q.G. (Editor), pp. 11-16.
Fanning, C.M., Flint, R.B., Parker, A.J., Ludwig, K.R., Blissett, A.H., 1988. Refined Proterozoic evolution of the Gawler craton, South Australia, through U-Pb zircon geochronology. Precambrian Research, 40: 363-386.
Fanning, C.M., Reid, A.J., Teale, G.S., 2007. A geochronological framework for the Gawler Craton, South Australia. Mineral Resources Group, Division of Minerals and Energy Resources, Primary Industries and Resources South Australia.
Forbes, C.J., Giles, D., Hand, M., Betts, P.G., Suzuki, K., Chalmers, N., Dutch, R., 2011. Using P–T paths to interpret the tectonothermal setting of prograde metamorphism: An example from the northeastern Gawler Craton, South Australia. Precambrian Research, 185(1-2): 65-85.
Forbes, C.J., Giles, D., Jourdan, F., Sato, K., Omori, S., Bunch, M., 2012. Cooling and exhumation history of the northeastern Gawler Craton, South Australia. Precambrian Research, 200-203: 209-238.
Fraser, G.L., Skirrow, R.G., Schmidt-Mumm, A., Holm, O., 2007. Mesoproterozoic gold in the central Gawler craton, South Australia: Geology, alteration, fluids, and timing. Economic Geology, 102(8): 1511-1539.
Hand, M., Reid, A., Jagodzinski, L., 2007. Tectonic framework and evolution of the Gawler Craton, Southern Australia. Economic Geology, 102(8): 1377-1395.
Huang, Q., Kamenetsky, V.S., McPhie, J., Ehrig, K., Meffre, S., Maas, R., Thompson, J., Kamenetsky, M., Chambefort, I., Apukhtina, O., Hu, Y., 2015. Neoproterozoic (ca. 820–830 Ma) mafic dykes at Olympic Dam, South Australia: Links with the Gairdner Large Igneous Province. Precambrian Research, 271: 160-172.
Huang, Q., Kamenetsky, V.S., Ehrig, K., McPhie, J., Kamenetsky, M., Cross, K., Meffre, S., Agangi, A., Chambefort, I., Direen, N.G., Maas, R., Apukhtina, O., 2016. Olivine-phyric basalt in the Mesoproterozoic Gawler silicic large igneous province, South Australia: Examples at the Olympic Dam Iron Oxide Cu–U–Au–Ag deposit and other localities. Precambrian Research, 281: 185-199.
Jagodzinski, E.A., 2014. The age of magmatic and hydrothermal zircon at Olympic Dam, In: Proceedings of 2014 Australian Earth Sciences Convention (AESC), Sustainable Australia, Newcastle, NSW, Australia, pp. 260.
Jagodzinski, E.A., Reid, A., Crowley, J., McAvaney, S., Wade, C., 2016. Precise zircon U–Pb dating of a Mesoproterozoic silicic large igneous province: The Gawler Range Volcanics and Benagerie Volcanic Suite, South Australia, Australian Earth Sciences Convention, South Australia, pp. 494.
Johnson, J.P., 1993. The Geochronology and Radiogenic Isotope systymatics of the Olympic Dam Copper-Uranium-Gold-Silver Deposit, South Australia, Australia National University, Canberra, 319 pp.
Kamenetsky, V.S., Ehrig, K., Maas, R., Meffre, S., Kamenetsky, M.B., McPhie, J., Apukhtina, O.B., Huang, Q.-Y., Thompson, J., Ciobanu, C.L., Cook, N.J., 2015. The supergiant Olympic Dam Cu-U-Au-Ag ore deposit: Towards a new genetic model. In: abs. (Editor), Society of Economic Geologists, SEG 2015: World-class ore deposits: Discovery to Recovery. Proceedings, USB drive, Hobart, Australia, Septemb…
Maas, R., Kamenetsky, V., Ehrig, K., Meffre, S., McPhie, J., Diemar, G., 2011. Olympic Dam U-Cu-Au deposit, Australia: New age constraints. Mineralogical Magazine, 75: 1375.
Maas, R., Apukhtina, O.B., Kamenetsky, V.S., Ehrig, K., Sprung, P., Münker, C., 2022. Carbonates at the supergiant Olypmic Dam Cu-U-Au-Ag deposit, South Australia part 2: Sm-Nd, Lu-Hf and Sr-Pb isotope constraints on the chronology of carbonate deposition. Ore Geology Reviews, 140: 103745.
McInnes, B.I.A., Keays, R.R., Lambert, D.D., Hellstrom, J., Allwood, J.S., 2008. Re–Os geochronology and isotope systematics of the Tanami, Tennant Creek and Olympic Dam Cu–Au deposits. Australian Journal of Earth Sciences, 55(6-7): 967-981.
McPhie, J., Ehrig, K.J., Kamenetsky, M.B., Crowley, J.L., Kamenetsky, V.S., 2020. Geology of the Acropolis prospect, South Australia, constrained by high-precision CA-TIMS ages. Australian Journal of Earth Sciences, 67(5): 699-716.
Mortimer, G.E., Cooper, J.A., Paterson, H.L., Cross, K., Hudson, G.R.T., Uppill, R.K., 1988. Zircon U-Pb dating in the vicinity of the Olympic Dam Cu-U-Au deposit, Roxby Downs, South Australia. Economic Geology, 83(4): 694-709.
Page, R.W., Conor, C.H.H., Stevens, B.P.J., Gibson, G.M., Preiss, W.V., Southgate, P.N., 2005a. Correlation of Olary and Broken Hill Domains, Curnamona Province: Possible Relationship to Mount Isa and Other North Australian Pb-Zn-Ag-Bearing Successions. Economic Geology, 100(4): 663-676.
Page, R.W., Stevens, B.P.J., Gibson, G.M., 2005b. Geochronology of the sequence hosting the broken hill Pb-Zn-Ag orebody, Australia. Economic Geology, 100(4): 633-661.
Reid, A., Hand, M., Jagodzinski, E., Kelsey, D., Pearson, N., 2008. Paleoproterozoic orogenesis in the southeastern Gawler Craton, South Australia∗. Australian Journal of Earth Sciences, 55(4): 449-471.
Reid, A., 2019. The Olympic Cu-Au Province, Gawler Craton: A Review of the Lithospheric Architecture, Geodynamic Setting, Alteration Systems, Cover Successions and Prospectivity. Minerals, 9(6): 371.
Reid, A.J., Hand, M., 2012. Mesoarchean to mesoproterozoic evolution of the southern Gawler Craton, South Australia. Episodes, 35(1): 216-225.
Reid, A.J., Fabris, A., 2015. Influence of preexisting low metamorphic grade sedimentary successions on the distribution of iron oxide copper-gold mineralization in the Olympic Cu-Au province, Gawler craton. Economic Geology, 110(8): 2147-2157.
Skirrow, R., 2021. Iron oxide copper-gold (IOCG) deposits–a review (part 1): settings, mineralogy, ore geochemistry, and classification. Ore Geology Reviews, 140: 104569.
Skirrow, R.G., Ashley, P.M., McNaughton, N.J., Suzuki, K., 2000. Time–space framework of Cu-Au-(Mo) and regional alteration systems in the Curnamona Province, Australian Geological Survey Organisation Record 2000/10, pp. 83-86.
Skirrow, R.G., 2003. Fe-oxide Cu-Au deposits: Potential of the Curnamona Province in an Australian and global context. In: Peljo, M. (Editor), Broken Hill Exploration Initiative: Abstracts from the July 2003 conference. Geoscience Australia Broken Hill, pp. 158-161.
Tiddy, C.J., Giles, D., 2020. Suprasubduction zone model for metal endowment at 1.60–1.57 Ga in eastern Australia. Ore Geology Reviews, 122: 103483.
Verdugo-Ihl, M.R., Ciobanu, C.L., Cook, N.J., Ehrig, K., Slattery, A., Courtney-Davies, L., Dmitrijeva, M., 2021. Nanomineralogy of hydrothermal magnetite from Acropolis, South Australia: Genetic implications for iron-oxide copper gold mineralization. American Mineralogist, 106(8): 1273-1293.
Williams, P.J., Skirrow, R.G., 2000. Overview of iron oxide-copper-gold deposits in the Curnomona province and Cloncurry district (eastern Mount Isa block), Australia. In: Porter, T.M. (Ed.), Hydrothermal iron oxide copper-gold & related deposits: A global perspective. PGC Publishing, Adelaide, pp. 105-122.
